# Supplementary material for: A survey of enoldiazo nucleophilicity in selective C–C bond forming reactions for the synthesis of natural product-like frameworks
Source: Royal Society of Chemistry journal article supplement (doi:10.1039/c4ob00709c), 2014-01-01
Supplement: c4ob00709c1.pdf [file c4ob00709c1.pdf]

## *Supporting Information for*

### **A Survey of Enoldiazo Nucleophilicity in Selective C-C Bond Forming Reactions for the Synthesis of Natural Product-Like Frameworks**

**Yuxiao Liu,<sup>a,b</sup> Xichen Xu,<sup>a</sup> Charles S. Shanahan,<sup>a</sup> Yu Liu,<sup>a</sup> and Michael P. Doyle<sup>\*a</sup>**

<sup>a</sup> *Department of Chemistry and Biochemistry, University of Maryland, College Park, Maryland 20742, USA. Tel: +301-405-1788; E-mail: mdoyle3@umd.edu*

<sup>b</sup> *School of pharmacy, East China University of Science and Technology, Meilong Road 130, Shanghai 200237, China.*

#### **Table of Contents**

|                                                                                                                              |        |
|------------------------------------------------------------------------------------------------------------------------------|--------|
| Optimization of Reaction Conditions                                                                                          | S2     |
| Intramolecular Reactions of $\delta,\delta$ -Dialkoxy- $\beta$ -keto- $\alpha$ -diazoesters Catalyzed by Dirhodium Catalysts | S3     |
| <sup>1</sup> H and <sup>13</sup> C NMR Spectra of <b>7a-i, 9, 11a-e</b>                                                      | S4-S18 |
| <sup>1</sup> D NOE Study of the Coupling Product <b>11d</b>                                                                  | S19    |
| <sup>1</sup> H and <sup>13</sup> C NMR Spectra of <b>12a-b, 13a-b, 14, 15,17, 18</b>                                         | S20-27 |
| <sup>1</sup> D NOE Study of the Coupling Product <b>17</b>                                                                   | S28    |

Table 1 Optimization of Reaction Conditions. <sup>a</sup>

| Entry | R            | Catalyst (mol%)            | Solvent | Temperature (°C) | Yield <sup>b</sup> (%) |
|-------|--------------|----------------------------|---------|------------------|------------------------|
| 1     | Me           | Zn(OTf) <sub>2</sub> (0.5) | DCM     | r.t.             | 65                     |
| 2     | Me           | La(OTf) <sub>3</sub> (1.0) | DCM     | r.t.             | trace                  |
| 3     | Me           | Yb(OTf) <sub>3</sub> (1.0) | DCM     | r.t.             | 16                     |
| 4     | Me           | Sn(OTf) <sub>2</sub> (1.0) | DCM     | r.t.             | 16                     |
| 5     | Et           | Zn(OTf) <sub>2</sub> (0.5) | DCM     | r.t.             | 62                     |
| 6     | <i>i</i> -Pr | Zn(OTf) <sub>2</sub> (0.5) | DCM     | r.t.             | 56                     |
| 7     | <i>i</i> -Pr | Zn(OTf) <sub>2</sub> (0.5) | MeCN    | r.t.             | 66                     |
| 8     | <i>i</i> -Pr | Zn(OTf) <sub>2</sub> (1.0) | MeCN    | r.t.             | 75                     |
| 9     | <i>i</i> -Pr | Sc(OTf) <sub>3</sub> (1.0) | MeCN    | r.t.             | 88                     |
| 10    | <i>i</i> -Pr | Sc(OTf) <sub>3</sub> (1.0) | MeCN    | 40               | 60                     |
| 11    | <i>i</i> -Pr | Sc(OTf) <sub>3</sub> (1.0) | MeCN    | 60               | 44                     |
| 12    | <i>i</i> -Pr | Sc(OTf) <sub>3</sub> (0.5) | MeCN    | r.t.             | 84                     |

<sup>a</sup> Reaction conditions: a mixture of enoldiazoacetate ( 1.2 equiv.), orthoformate ( 1.0 equiv.), molecular sieve (100 mg/mmol) and catalyst (0.5-1.0 mol%) in freshly distilled solvent (0.5M) was stirred at the specified temperature for 16 hours. <sup>b</sup> Yield was determined by <sup>1</sup>H NMR spectroscopic analysis using naphthalene as the internal standard.

Table 2 Intramolecular Reactions of  $\delta,\delta$ -Dialkoxy- $\beta$ -keto- $\alpha$ -diazoesters Catalyzed by Dirhodium Catalysts <sup>a</sup>

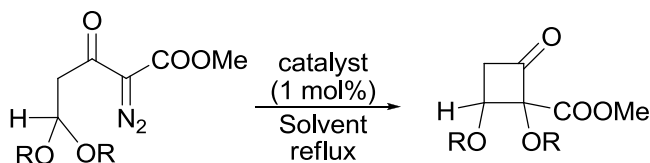

| Entry | R            | Catalyst (mol%)                                          | Solvent | Yield <sup>b</sup> (%) | dr. <sup>c</sup> |
|-------|--------------|----------------------------------------------------------|---------|------------------------|------------------|
| 1     | Me           | Rh <sub>2</sub> (OAc) <sub>4</sub> (1.0)                 | DCM     | 80                     | 75:25            |
| 2     | Me           | Rh <sub>2</sub> (pfb) <sub>4</sub> (1.0)                 | DCM     | 46                     | 58:42            |
| 3     | Me           | Rh <sub>2</sub> (OCCPh <sub>3</sub> ) <sub>4</sub> (1.0) | DCM     | 73                     | 70:30            |
| 4     | Me           | Rh <sub>2</sub> (cap) <sub>4</sub> (1.0)                 | DCM     | trace                  | -                |
| 5     | Me           | Rh <sub>2</sub> (cap) <sub>4</sub> (1.0)                 | DCE     | 28                     | 70:30            |
| 6     | Et           | Rh <sub>2</sub> (OAc) <sub>4</sub> (1.0)                 | DCM     | 75                     | 72:28            |
| 7     | <i>i</i> -Pr | Rh <sub>2</sub> (OAc) <sub>4</sub> (1.0)                 | DCM     | 72                     | 53:47            |

<sup>a</sup> Reaction conditions: a solution of diazoester (0.5 mmol) in 2 mL of anhydrous CH<sub>2</sub>Cl<sub>2</sub> was added *via* syringe pump over 2 h to a refluxing solution catalyst (1 mol%) in 1 mL of anhydrous solvent. <sup>b</sup> Isolated yield after column chromatography. <sup>c</sup> Diastereoselectivities were determined by <sup>1</sup>H NMR spectral analysis.

Methyl 2-Diazo-3-oxo-5,5-diphenylpentanoate (7a)

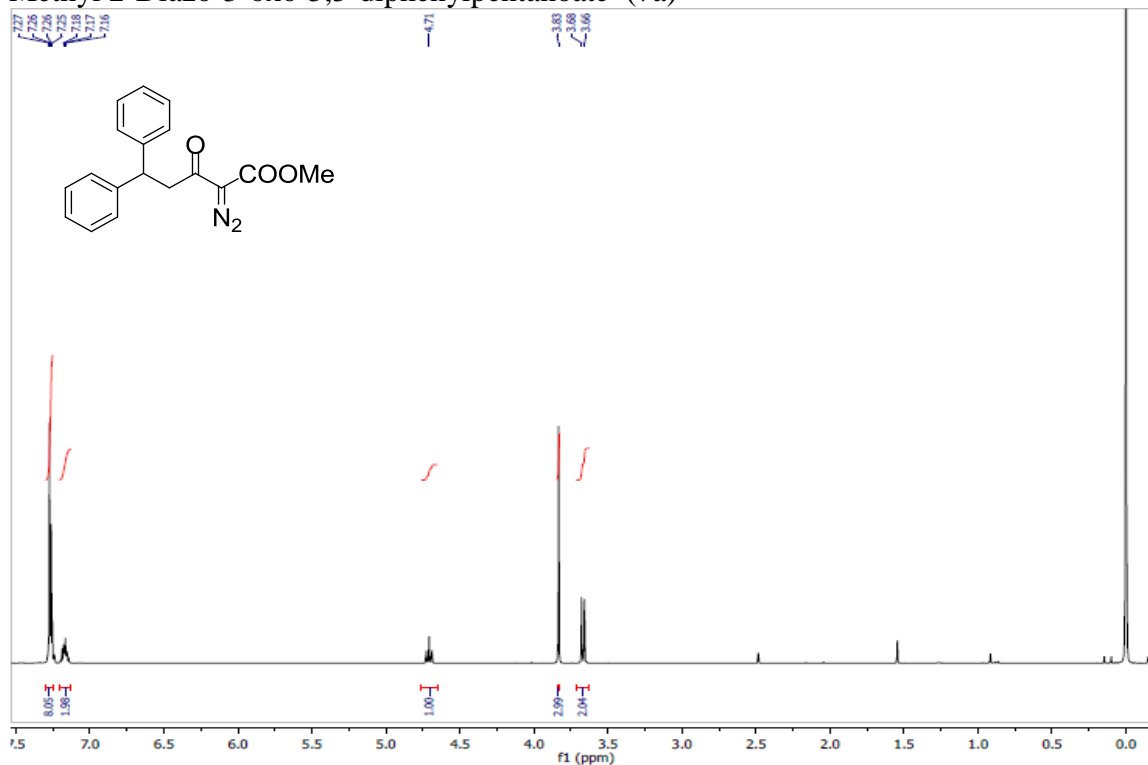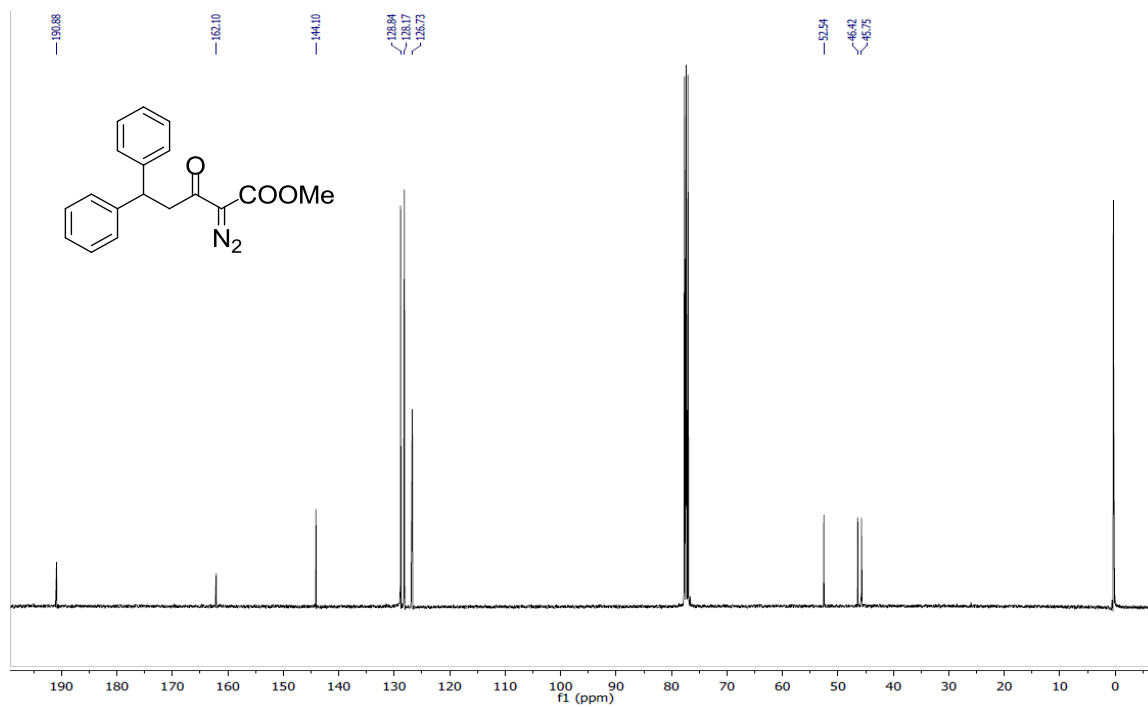

Methyl 2-Diazo-5,5-bis(4-methoxyphenyl)-3-oxopentanoate (7b)

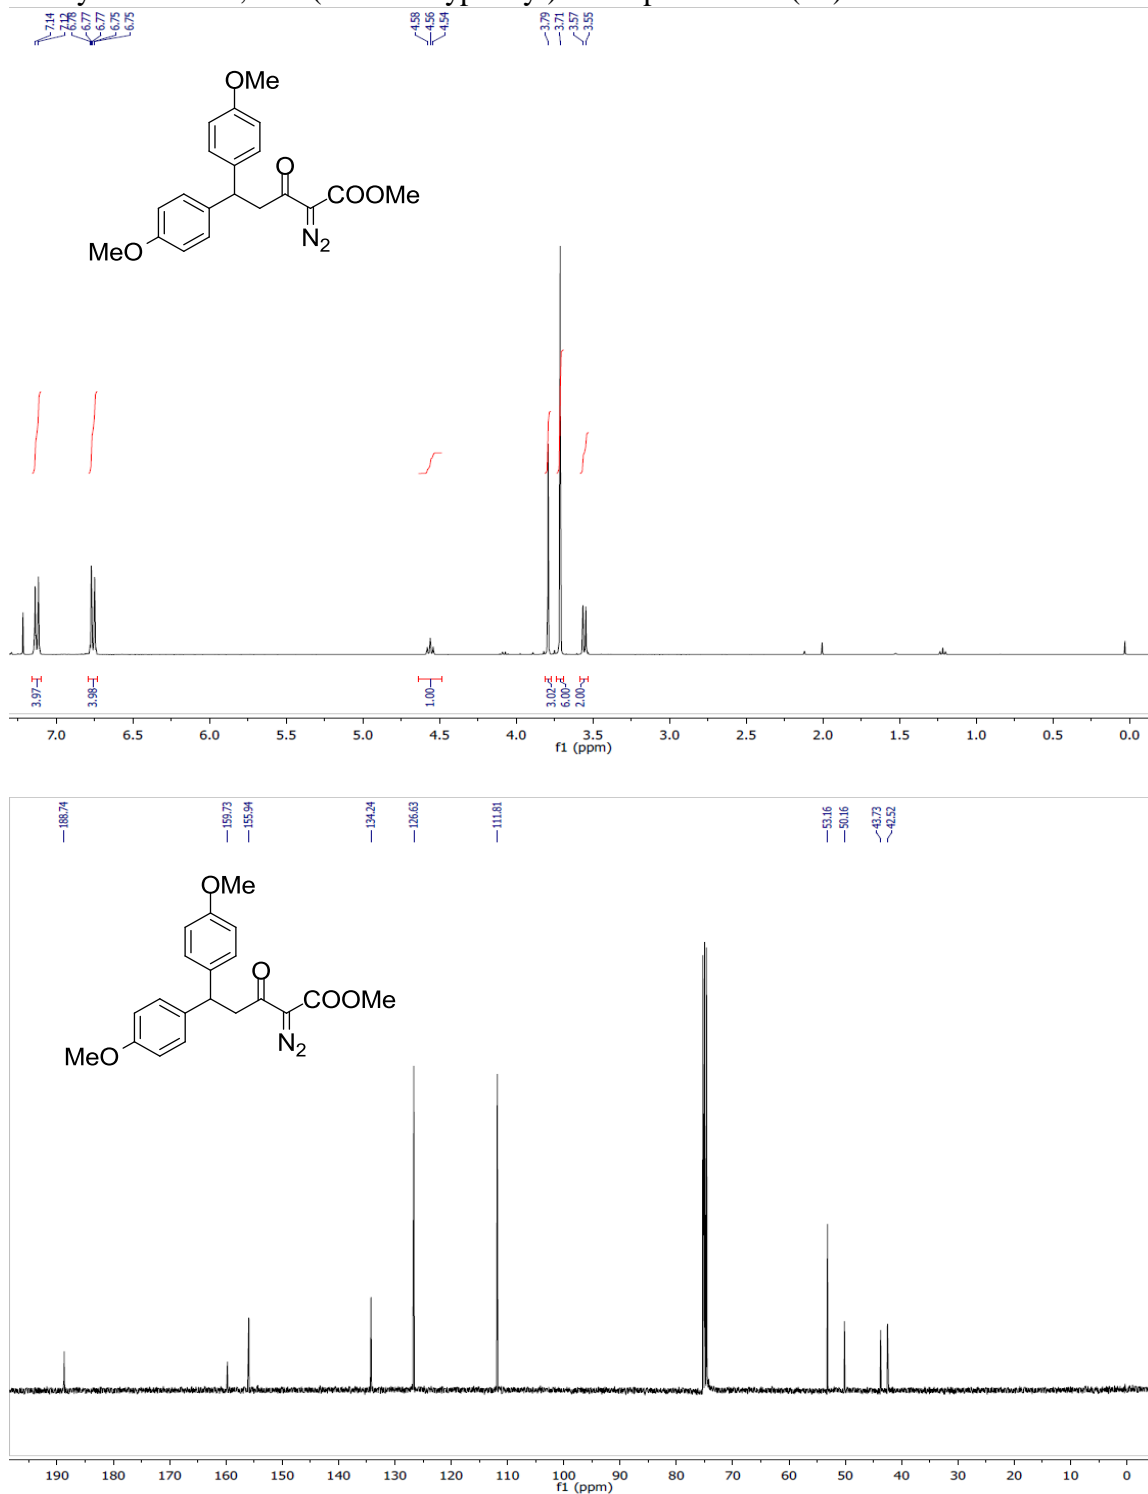



Methyl 2-Diazo-5-(4-methoxyphenyl)-3-oxo-5-phenylpentanoate (7d)

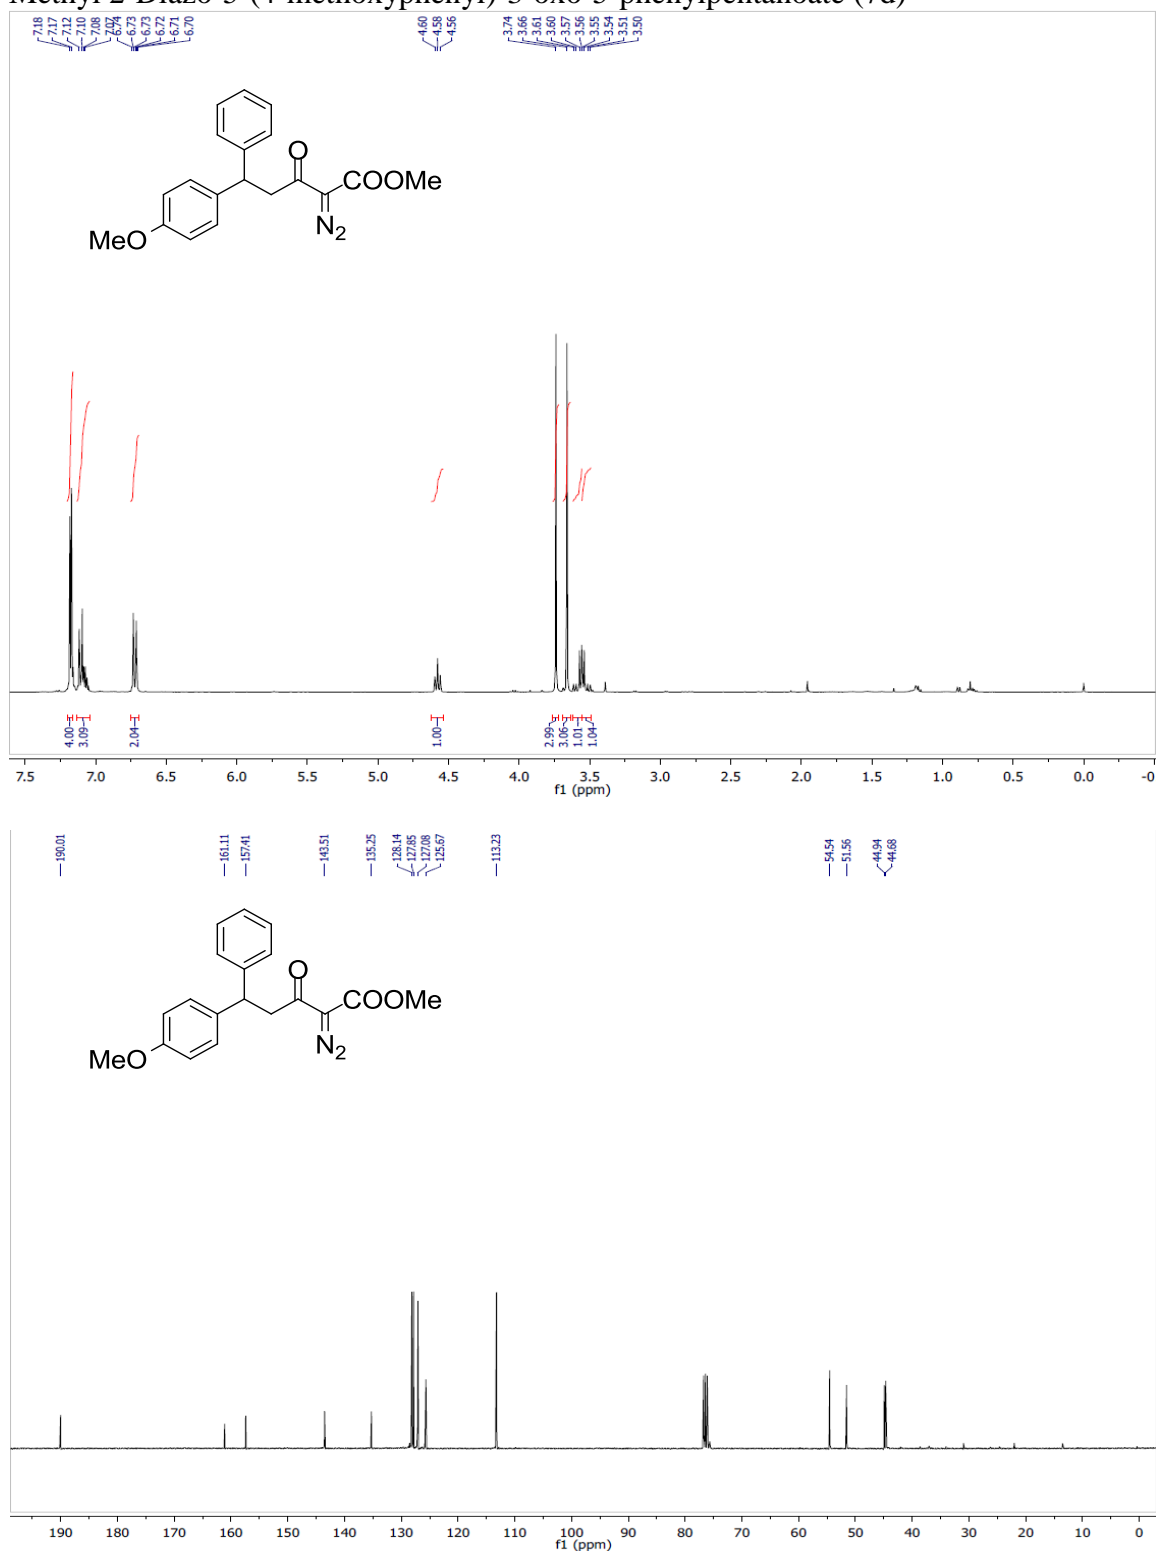

Methyl 2-Diazo-5-(3-methoxyphenyl)-3-oxo-5-phenylpentanoate (7e)

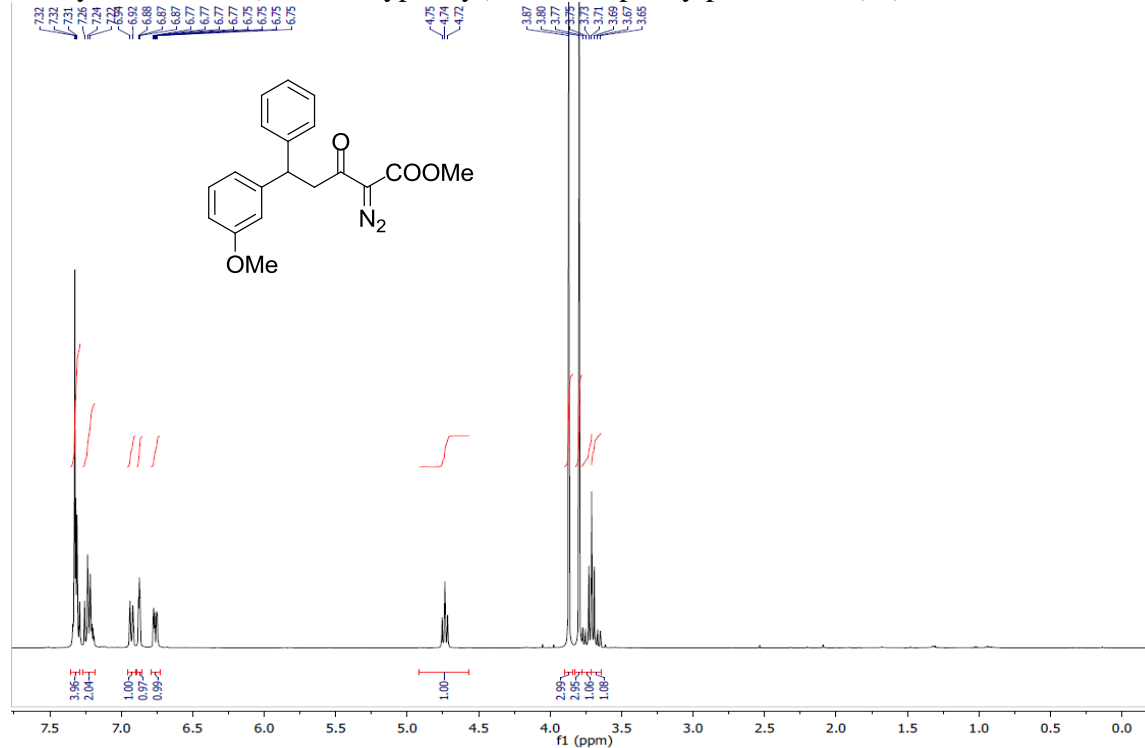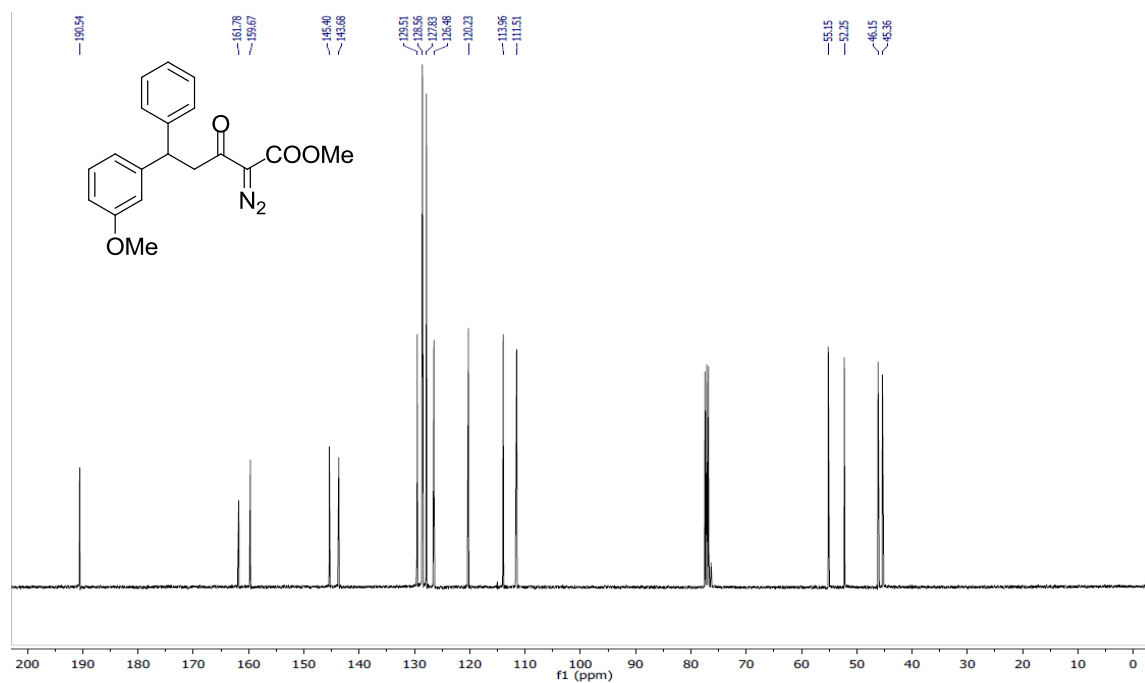

Methyl 2-Diazo-5-(2-methoxyphenyl)-3-oxo-5-phenylpentanoate (7f)

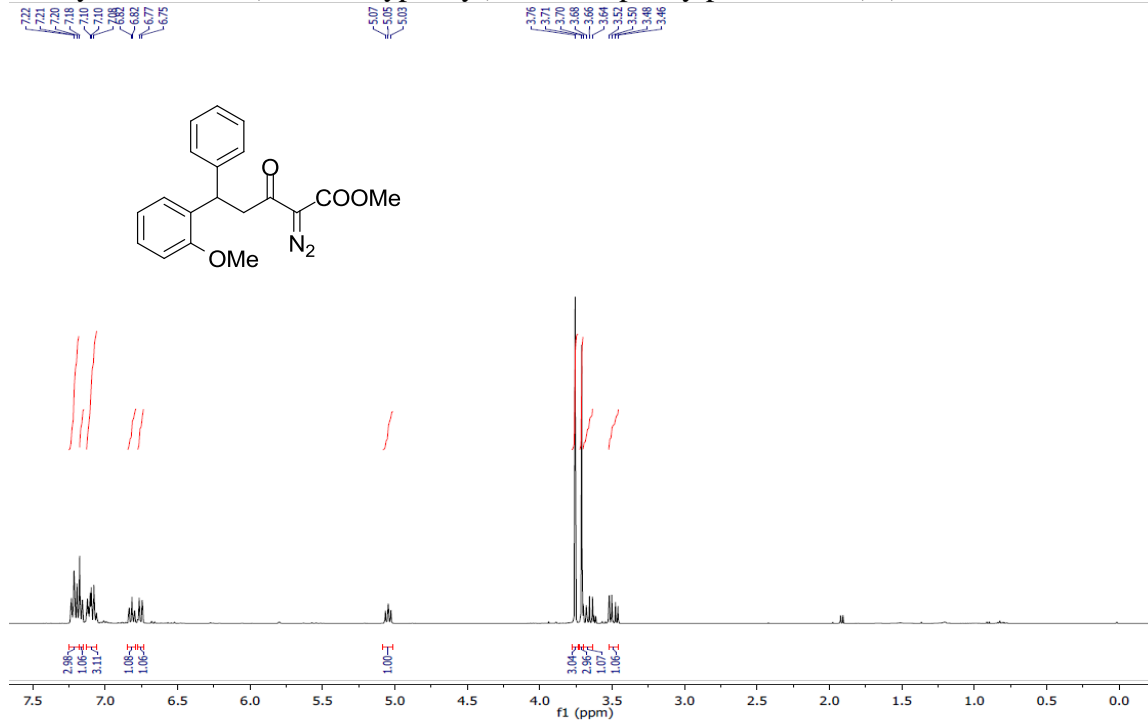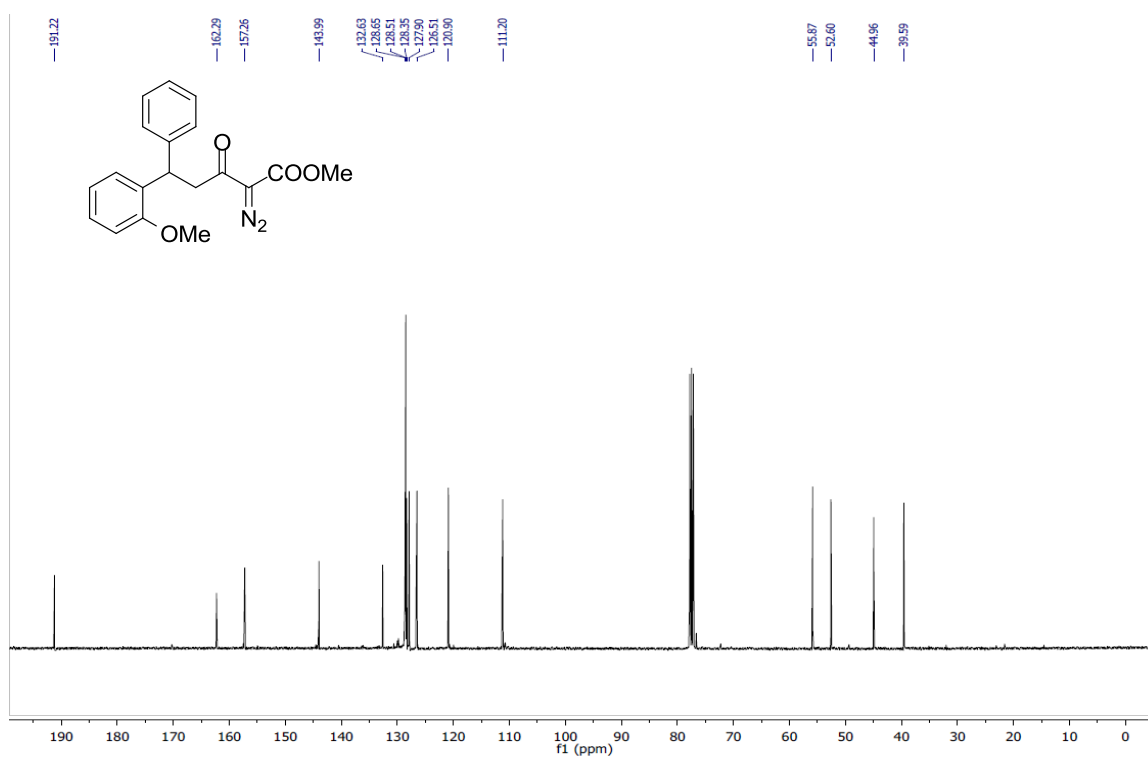

Methyl 5-(4-Chlorophenyl)-2-diazo-3-oxo-5-phenylpentanoate (7g)

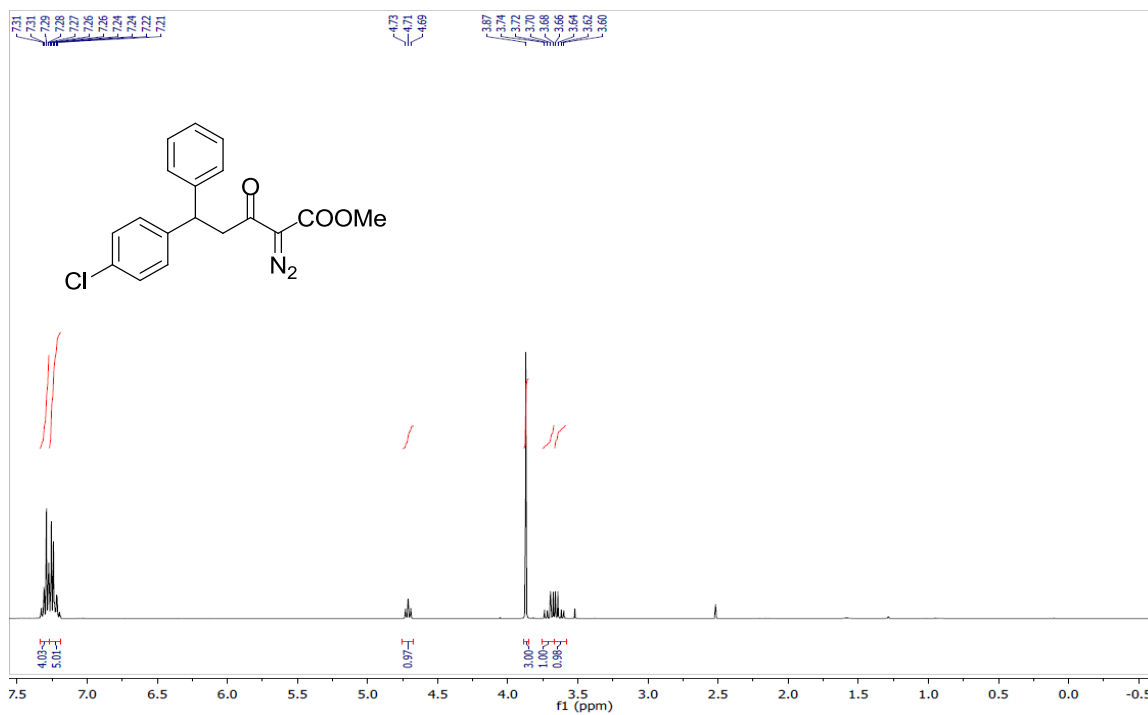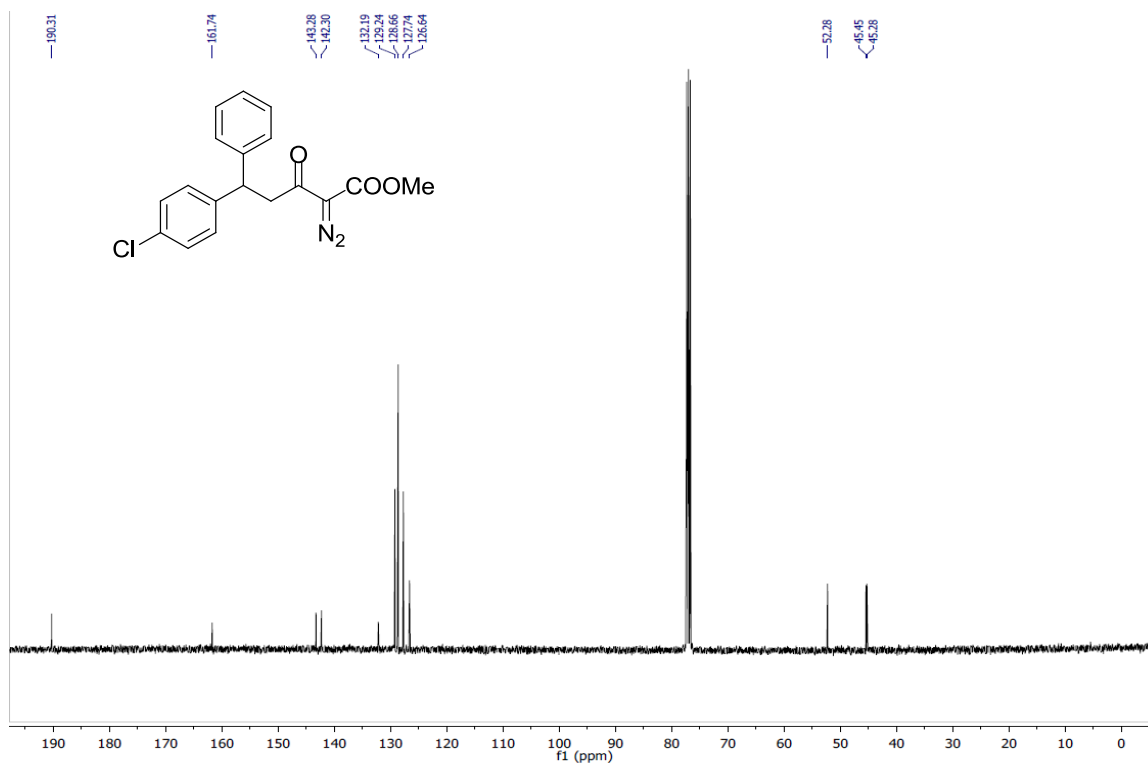

Methyl 2-Diazo-5-(4-nitrophenyl)-3-oxo-5-phenylpentanoate (7h)

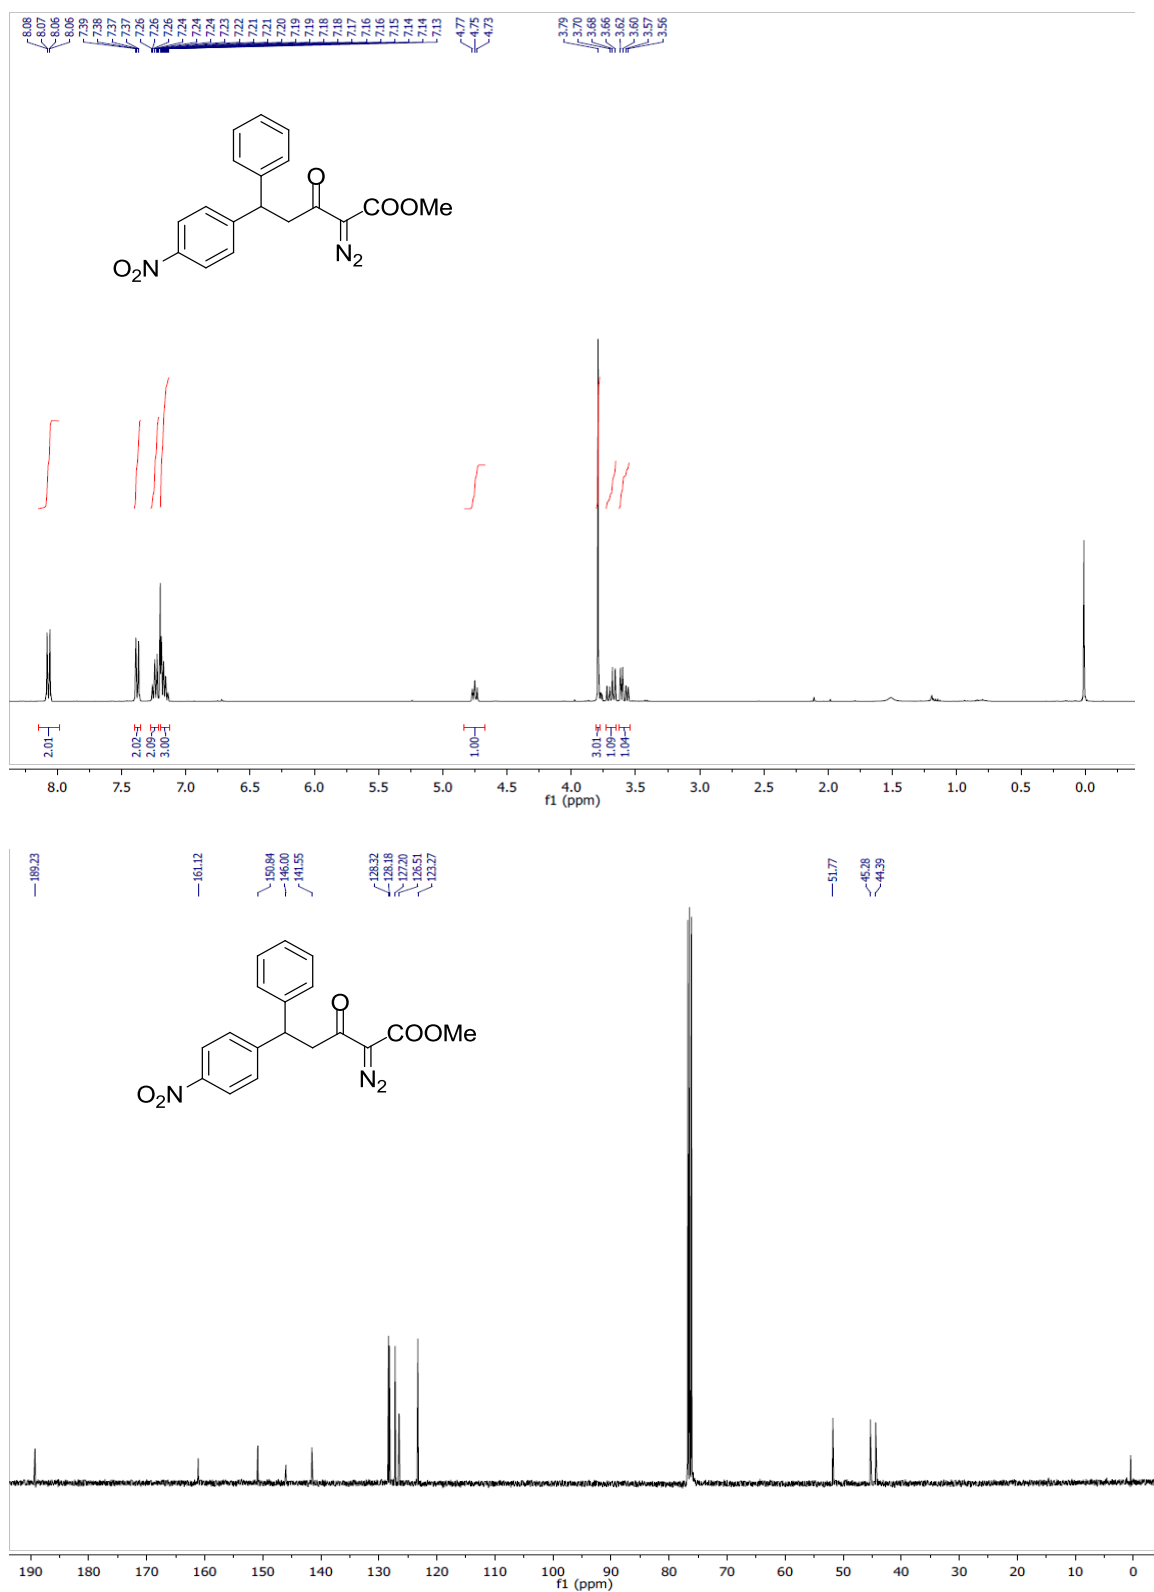

Methyl 2-Diazo-5-(naphthalen-2-yl)-3-oxo-5-phenylpentanoate (7i)

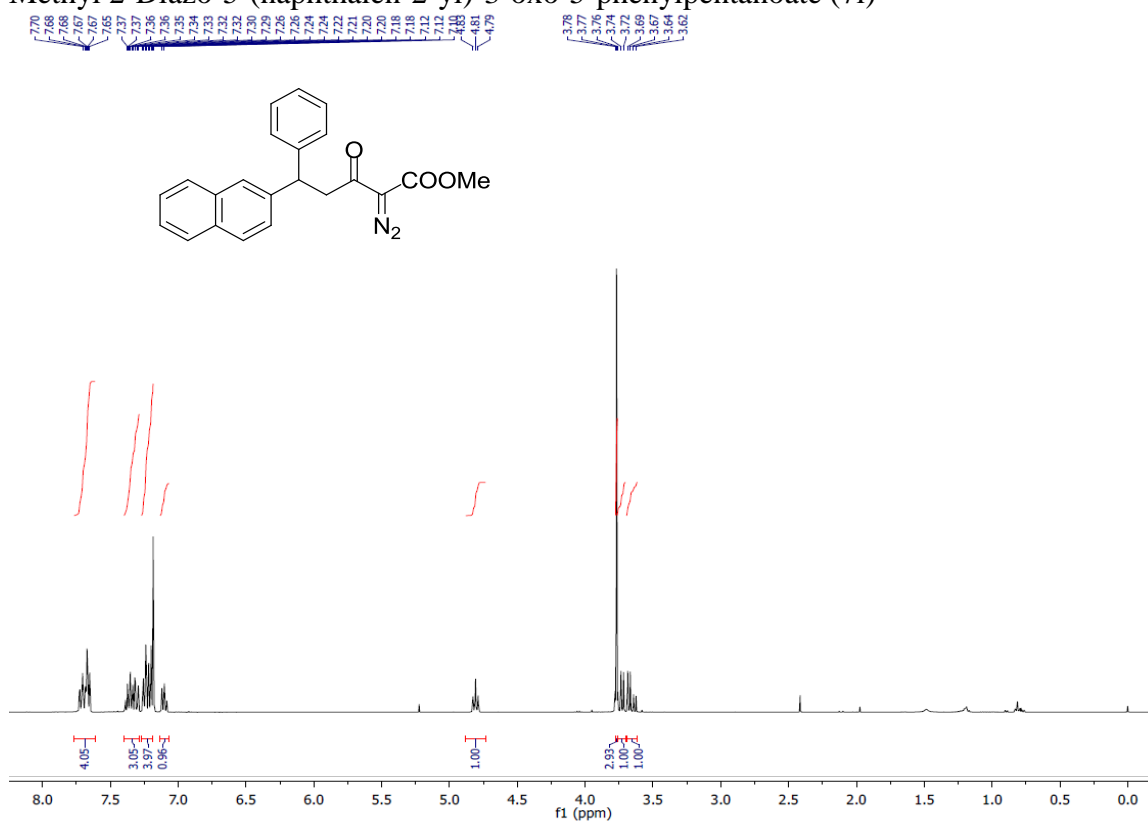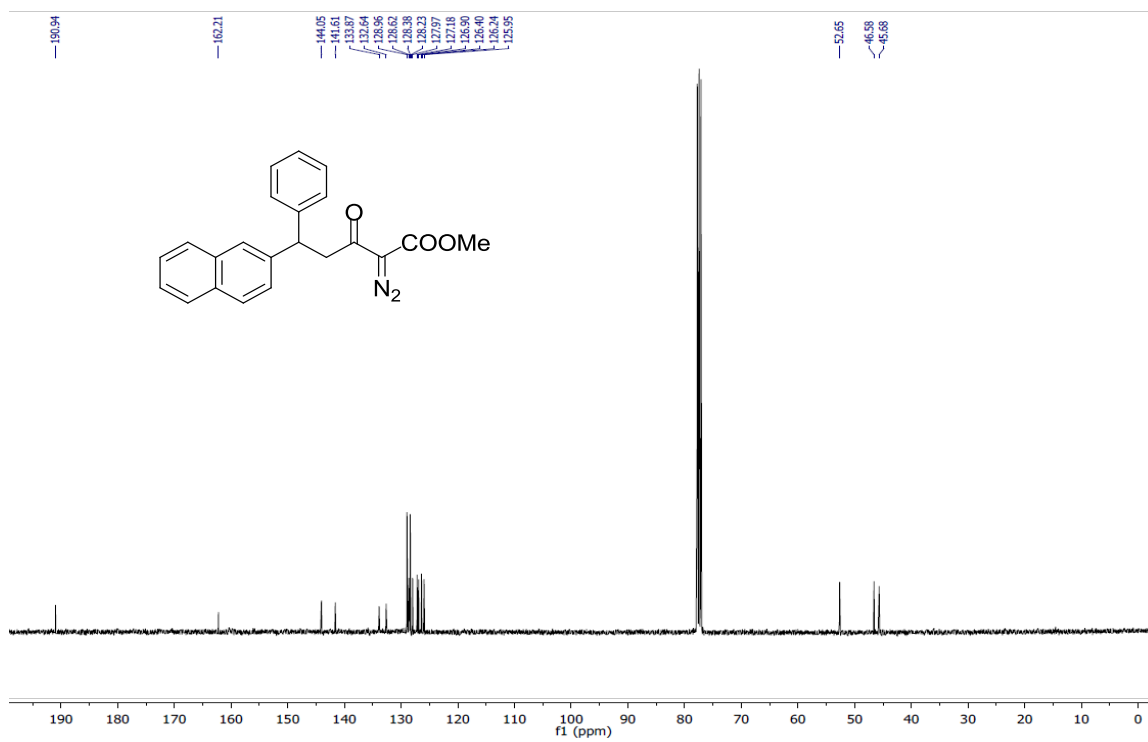

Methyl 2-Diazo-3-oxo-5,7-diphenylhept-6-enoate (9)

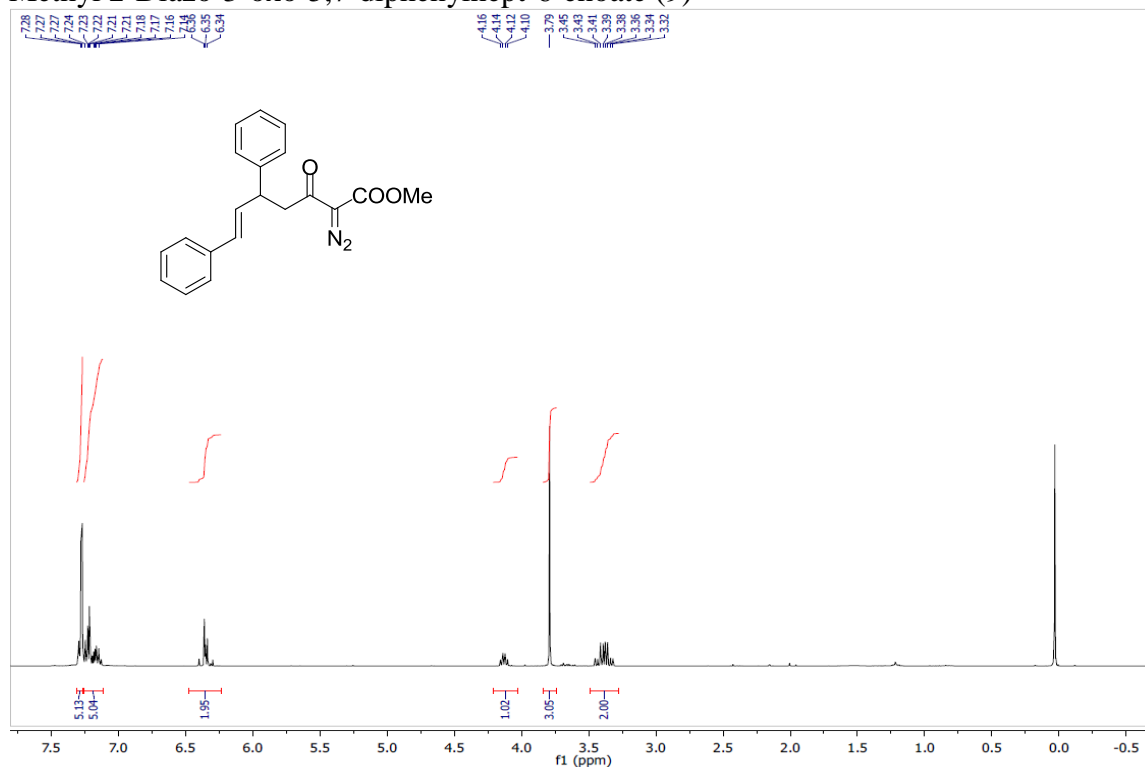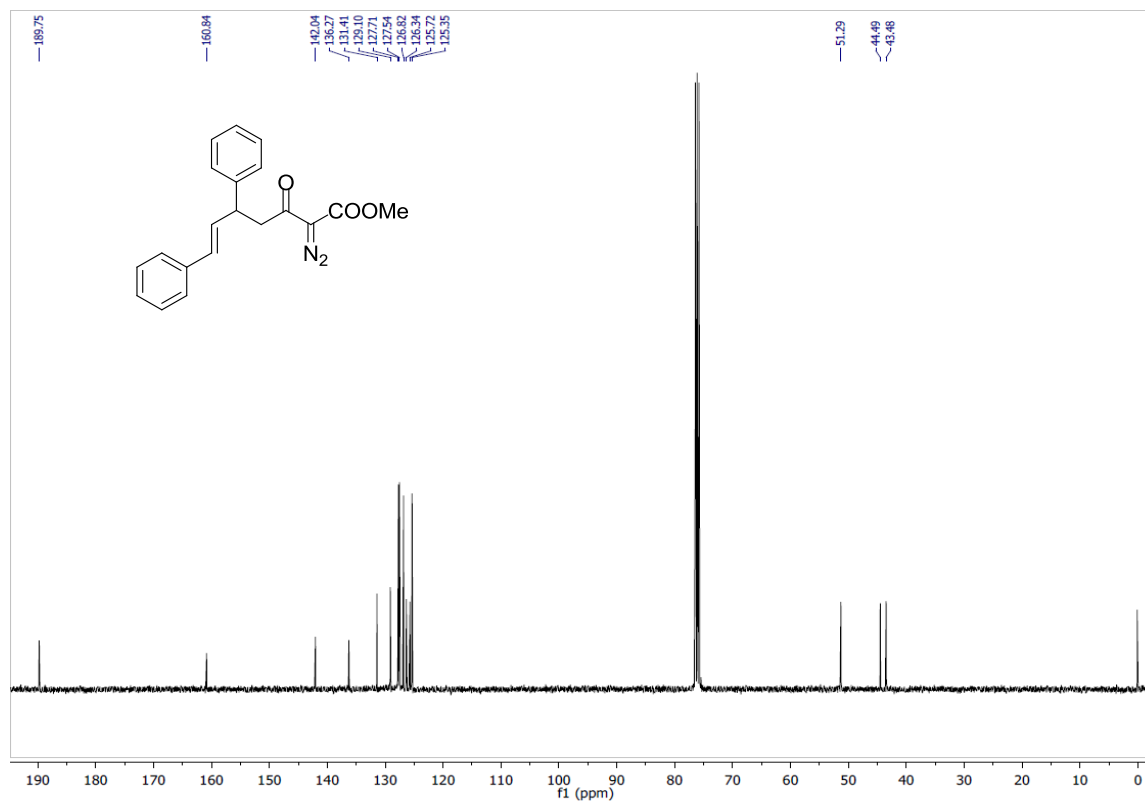

Methyl 5, 5-Diisopropoxy-3-oxo-2-diazopentanoate (11a)

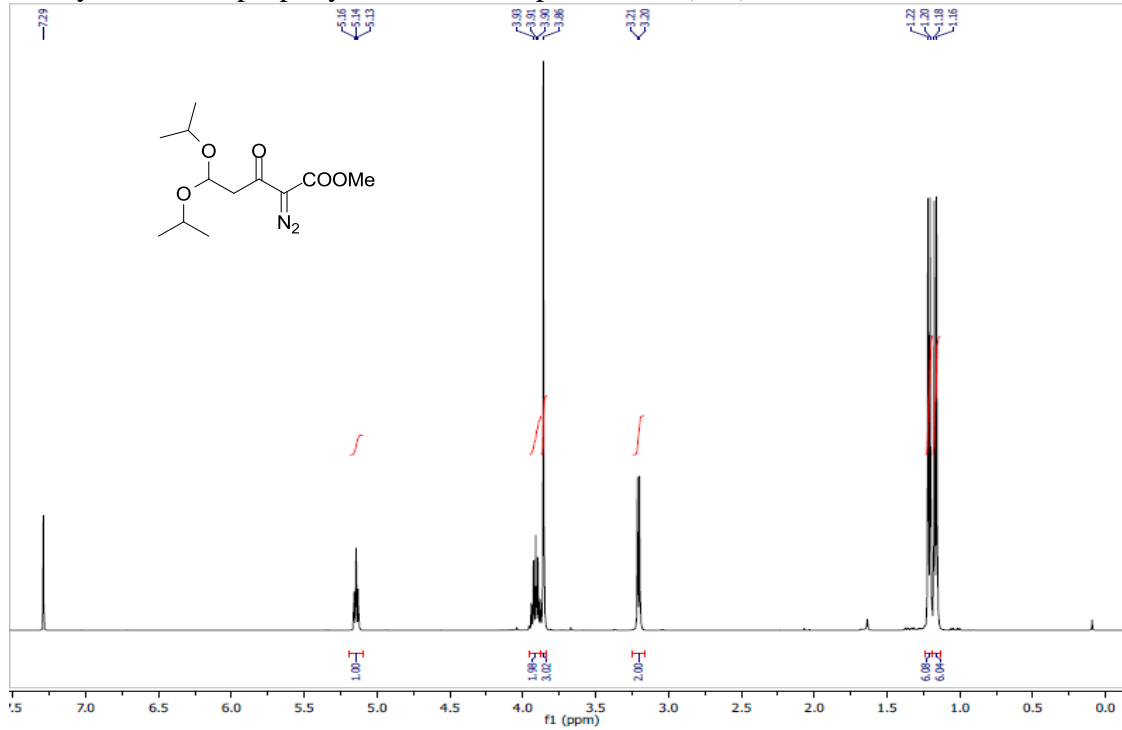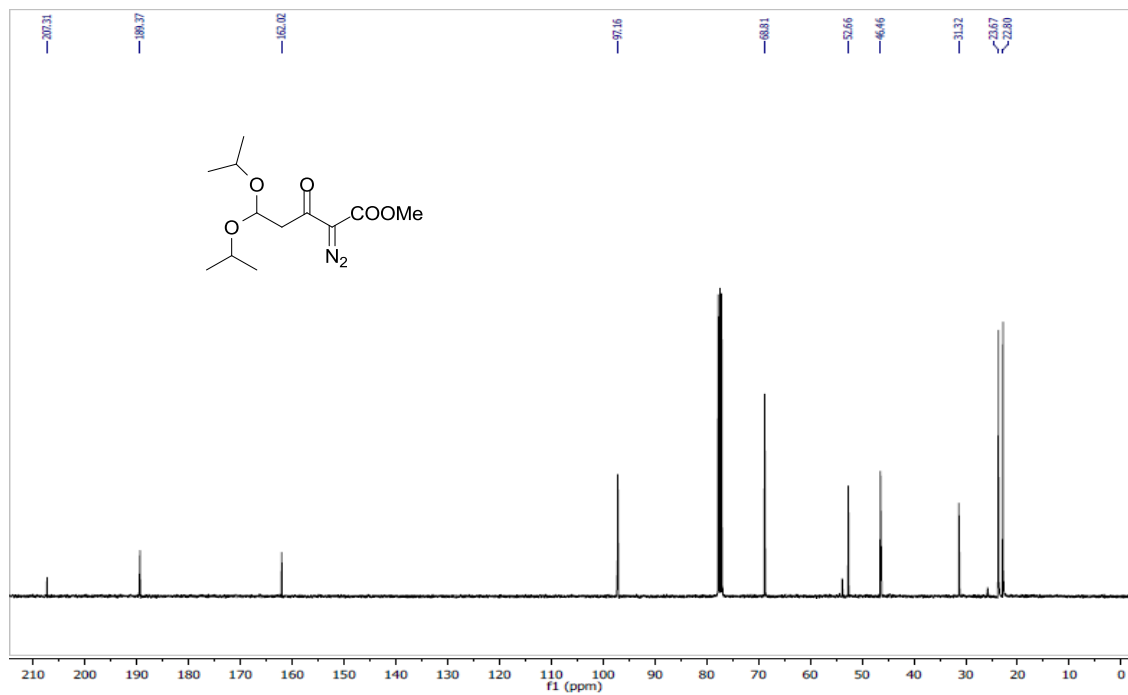

Methyl 5, 5-Dimethoxy-3-oxo-2-diazopentanoate (11b)

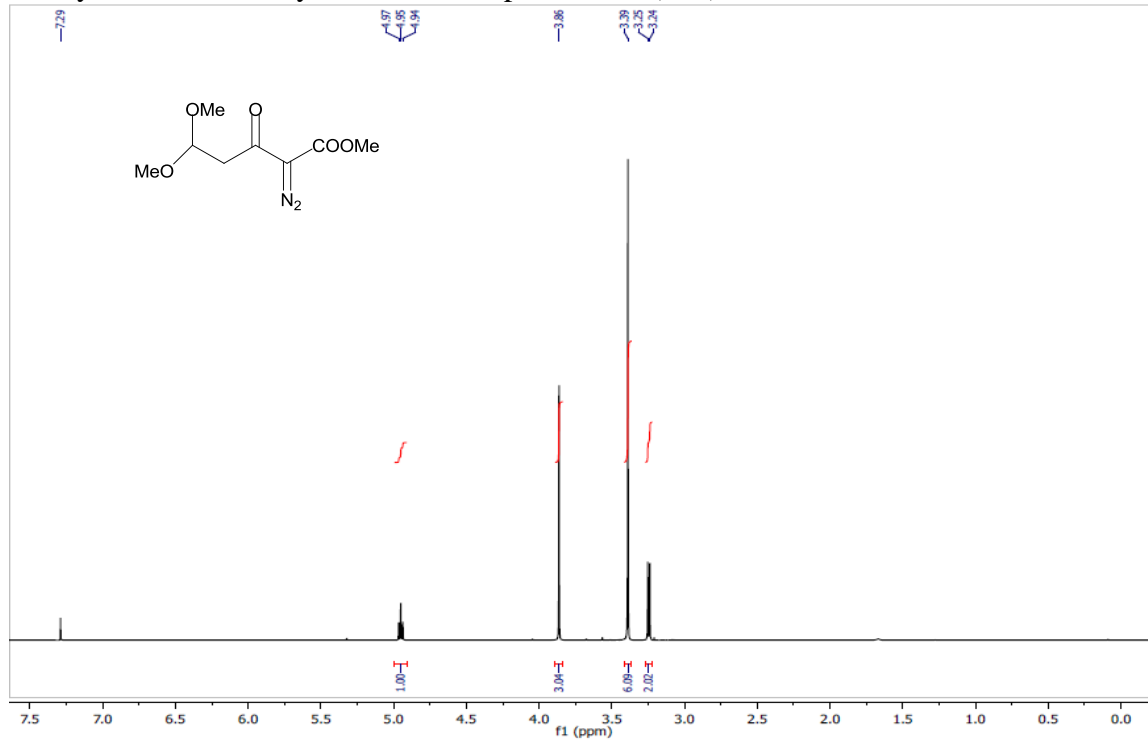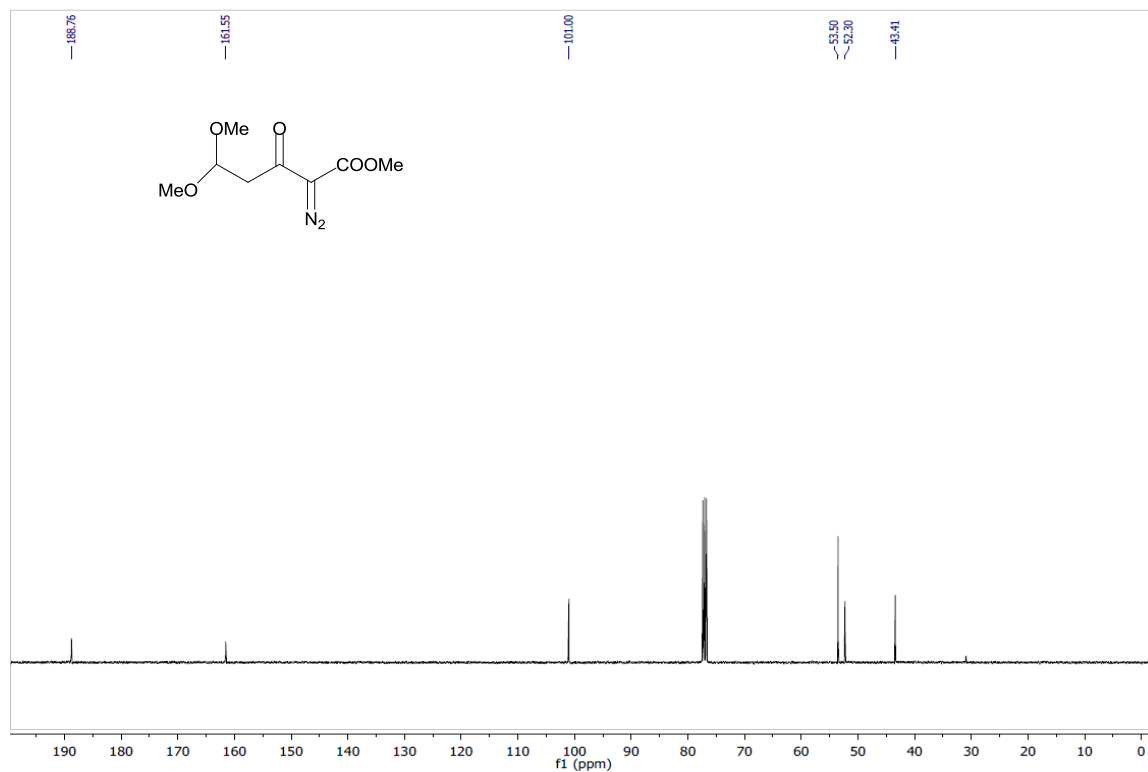

Methyl 5, 5-Dimethoxy-3-oxo-2-diazohexanoate (11c)

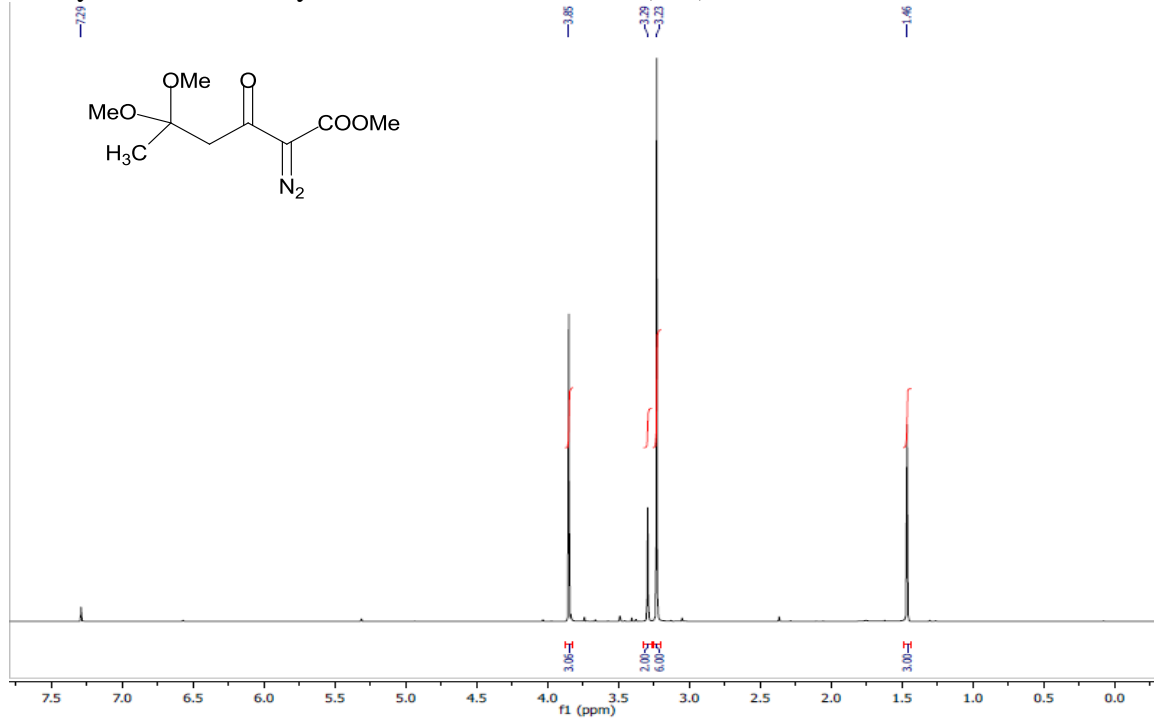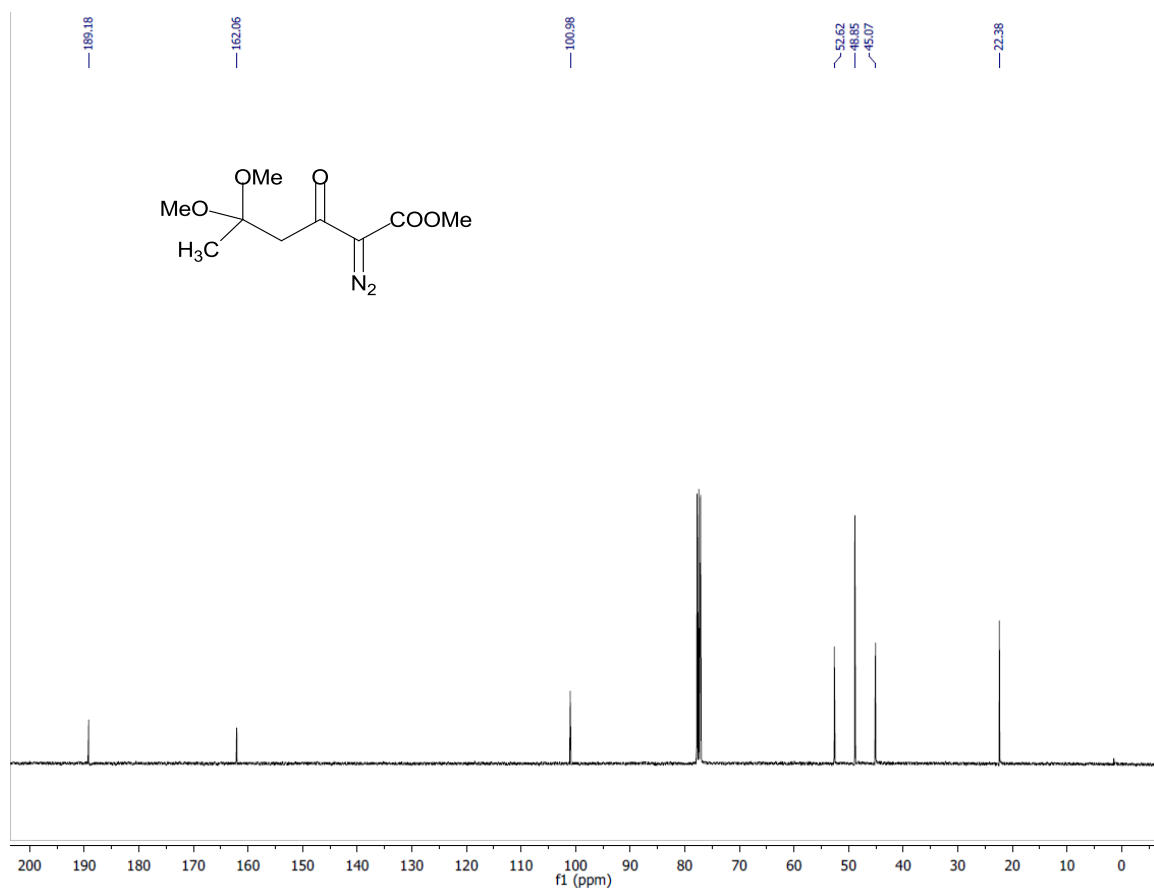

Methyl (*E*)-2-Diazo-5-methoxy-3-oxonon-4-enoate (11d)

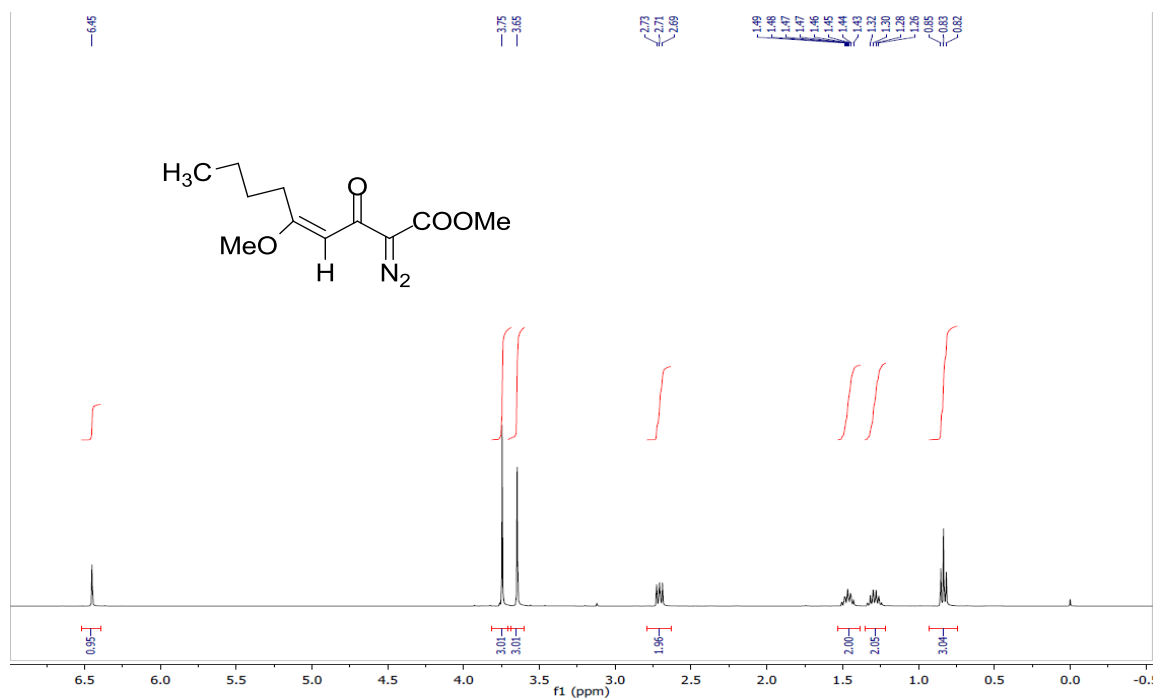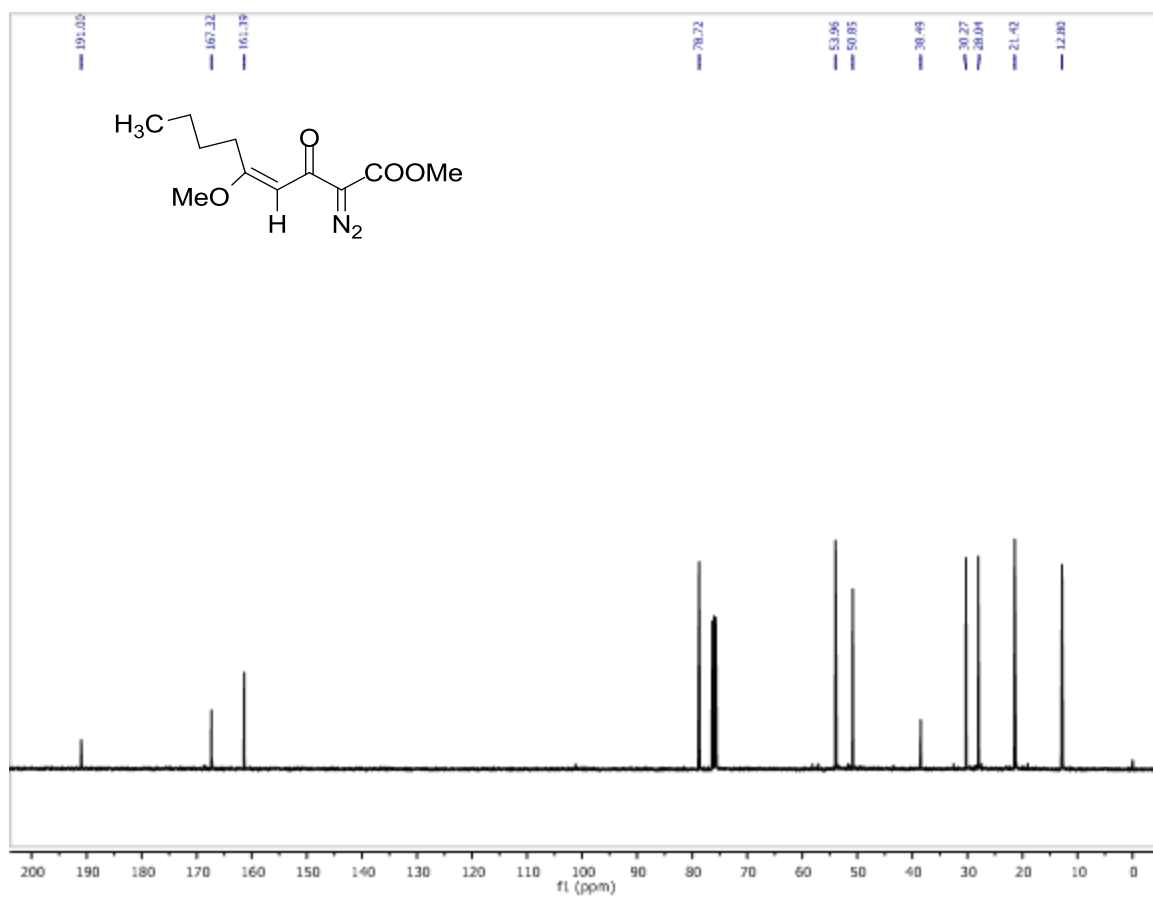

Methyl 2-Diazo-5,5-dimethoxy-3-oxo-5-phenylpentanoate (11e)

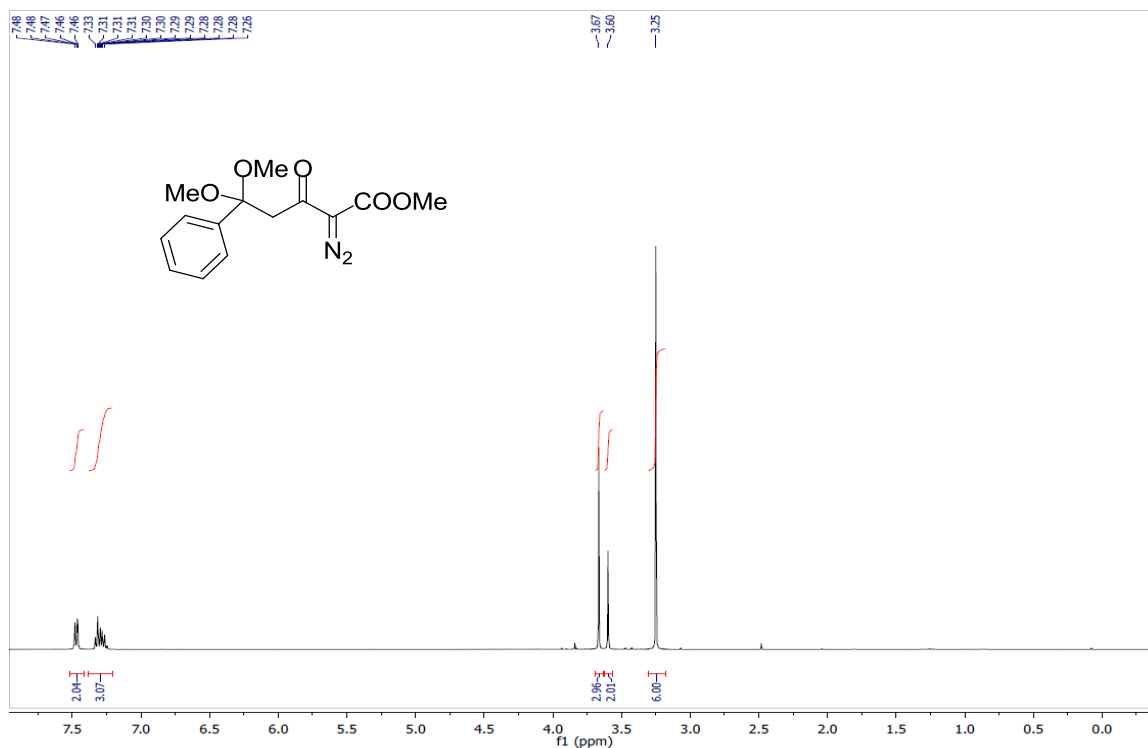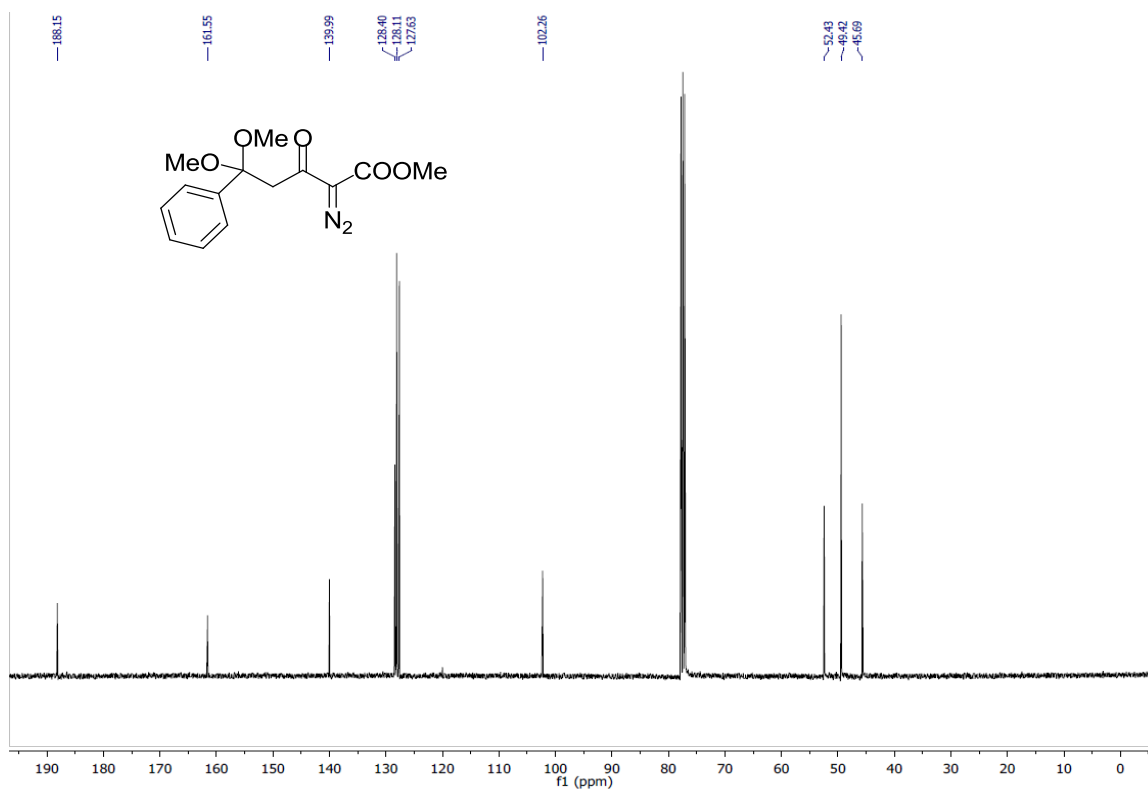



Methyl 2-Hydroxy-4-phenyl-3,4-dihydronaphthalene-1-carboxylate (12a)

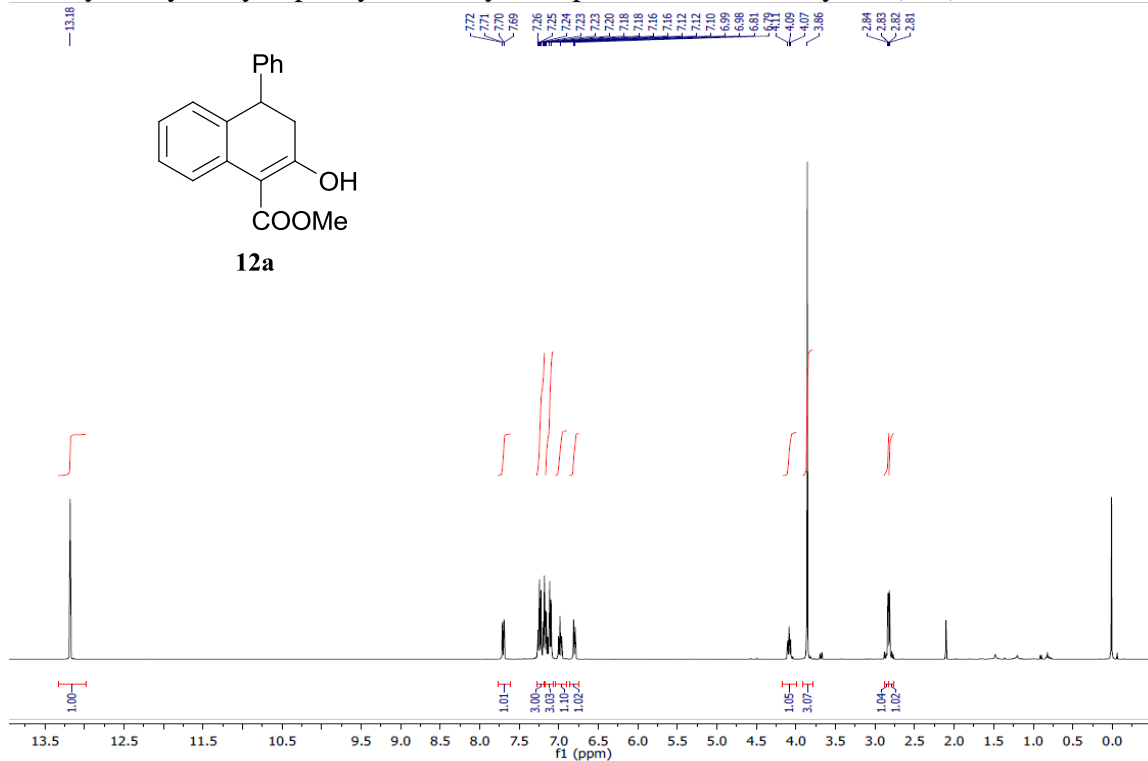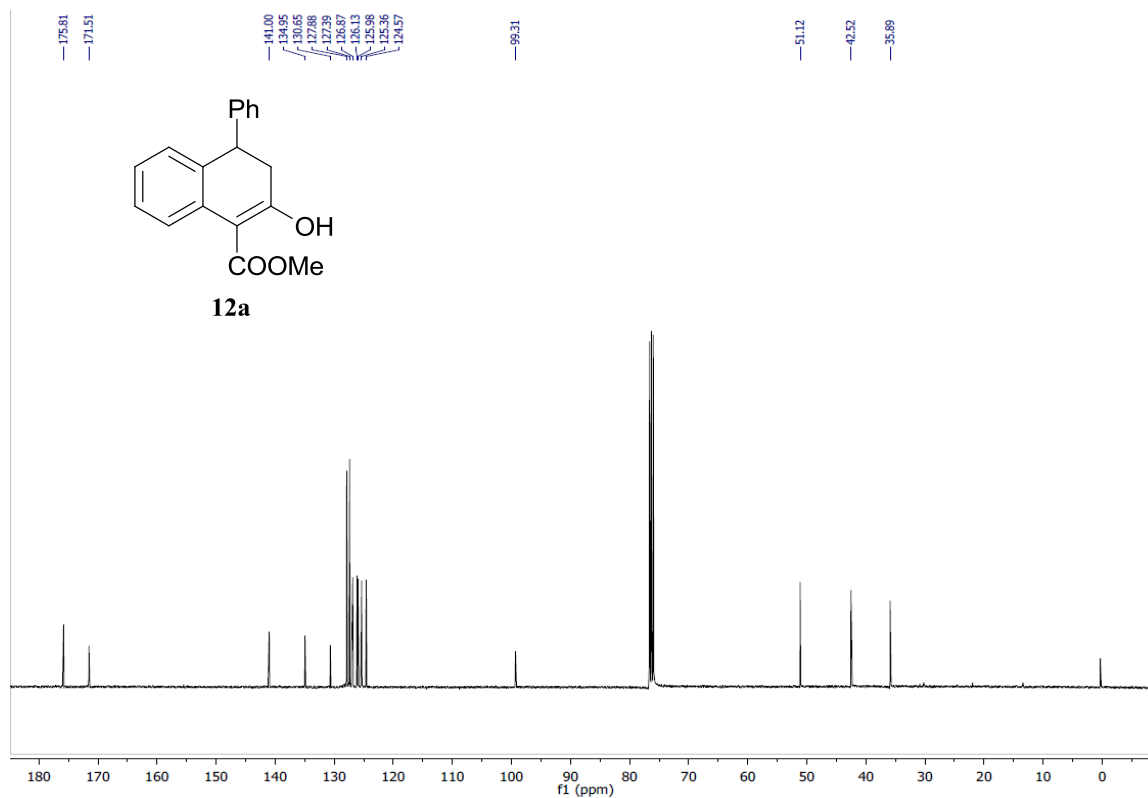



Methyl 2-Oxo-4,6-diphenylbicyclo[3.1.0]hexane-1-carboxylate (13a and b)

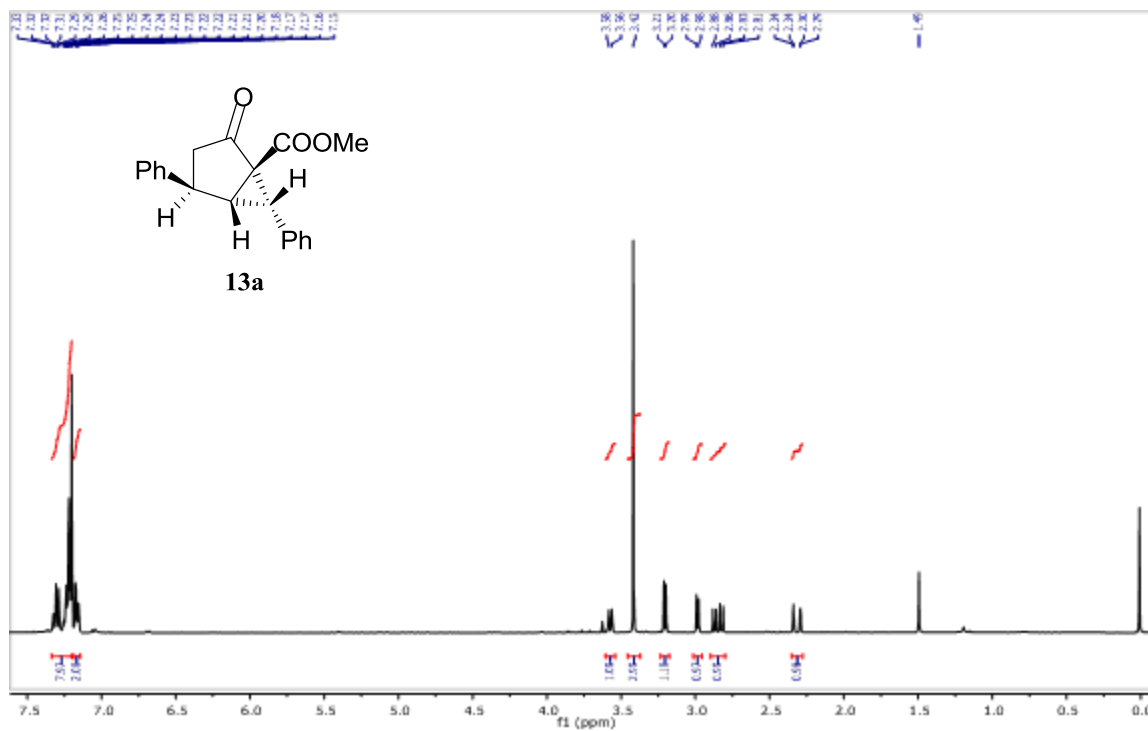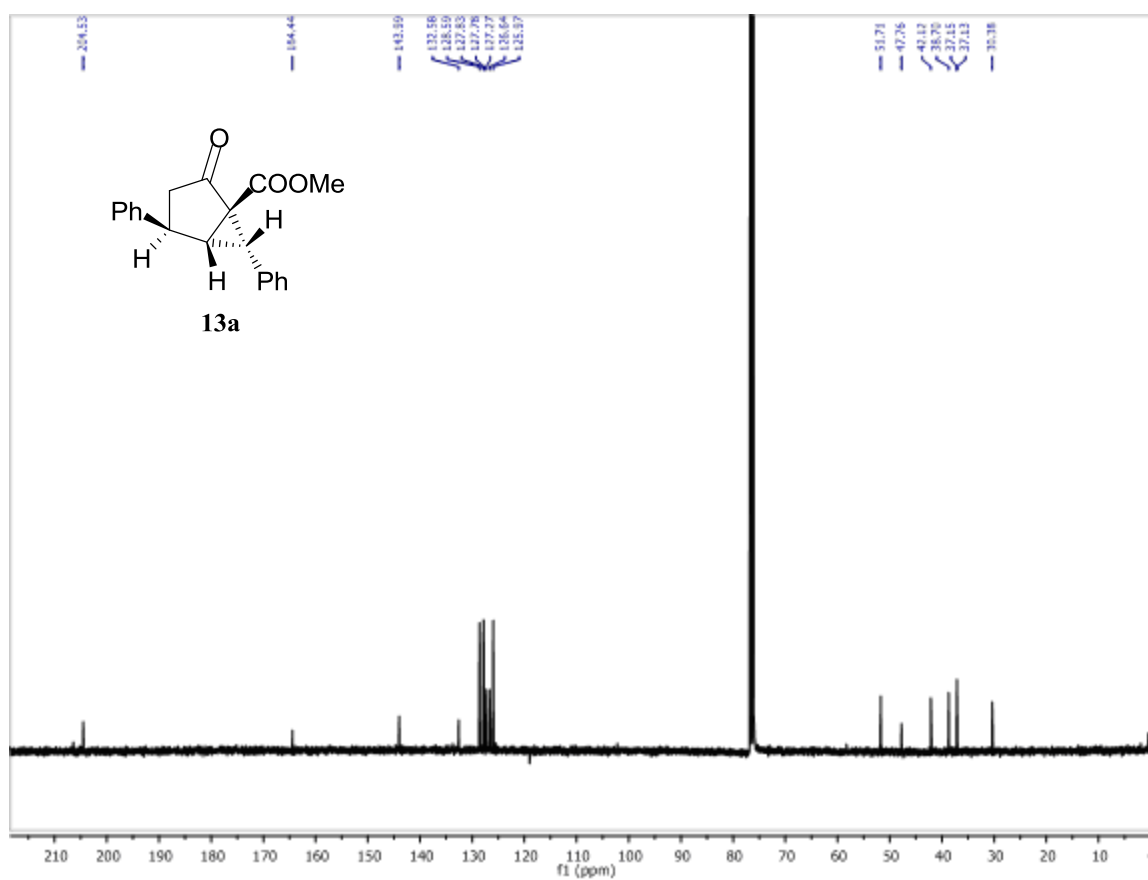

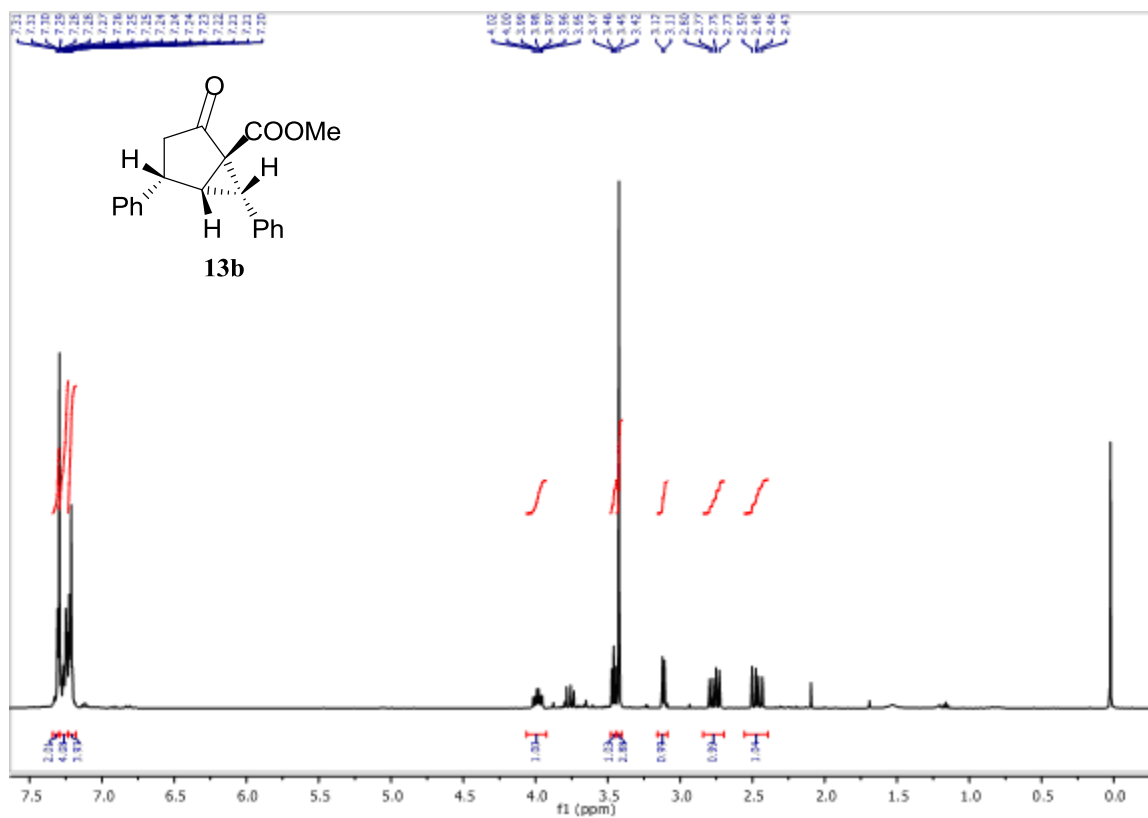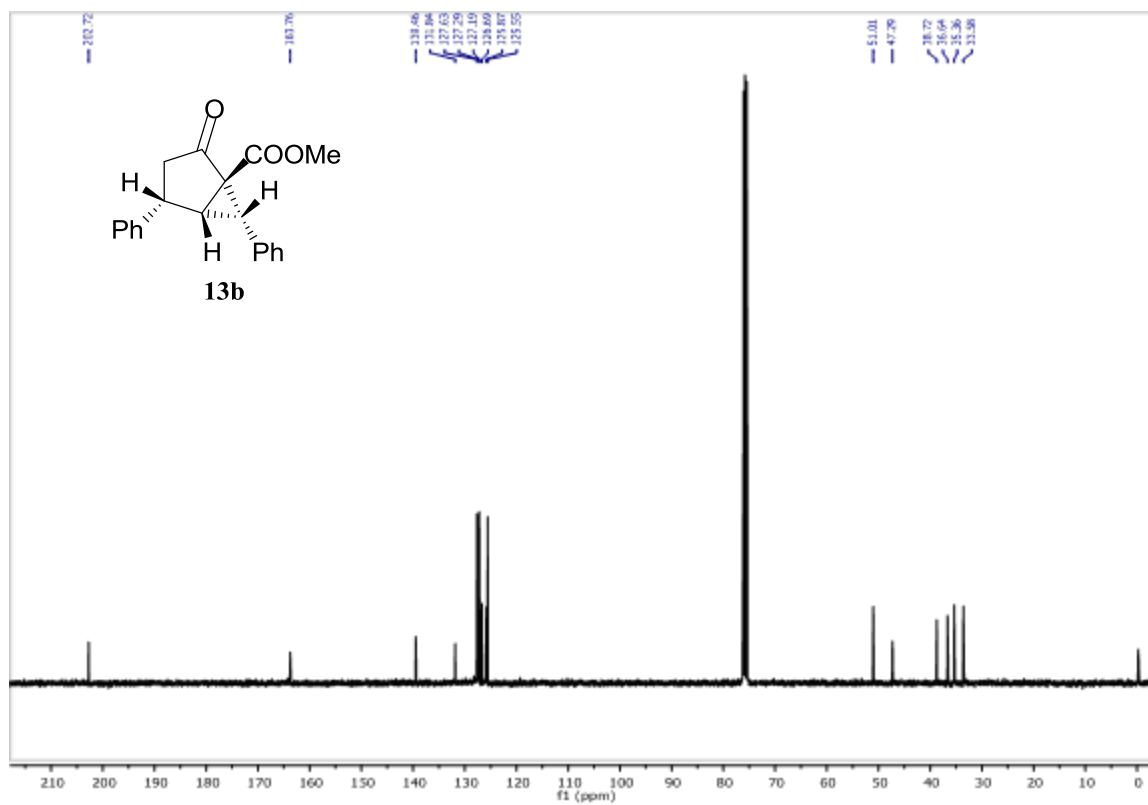

1, 2-Dimethoxy-4-oxocyclobutanecarboxylate (14)

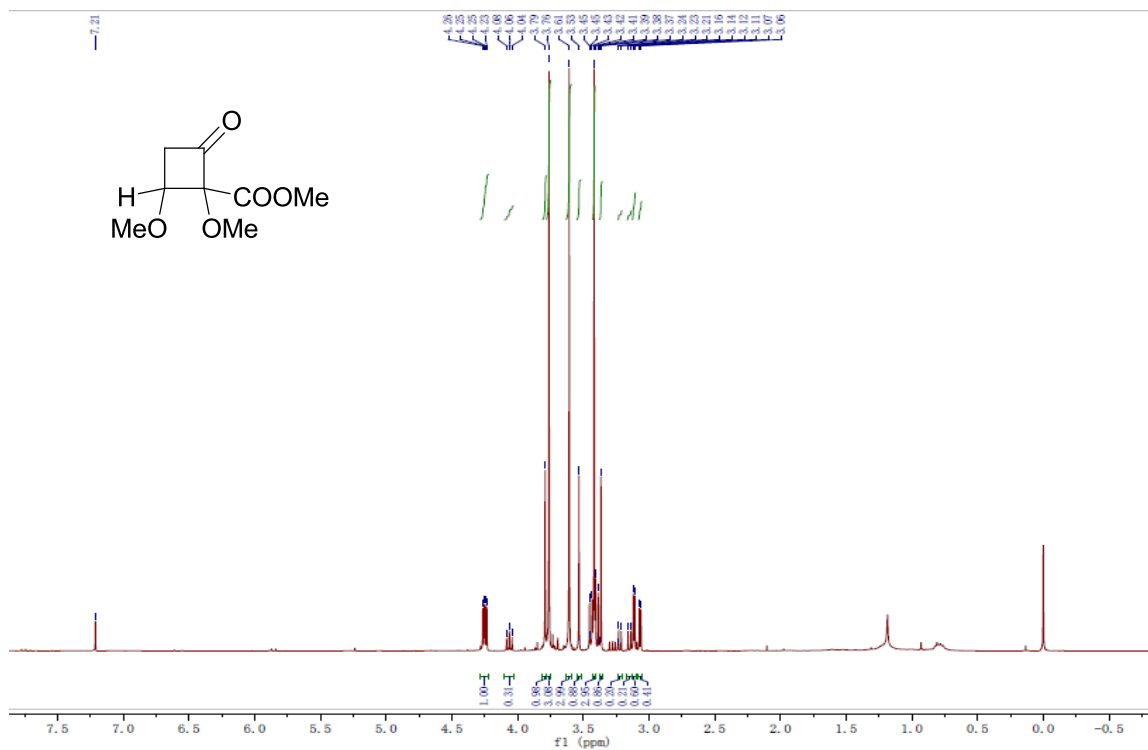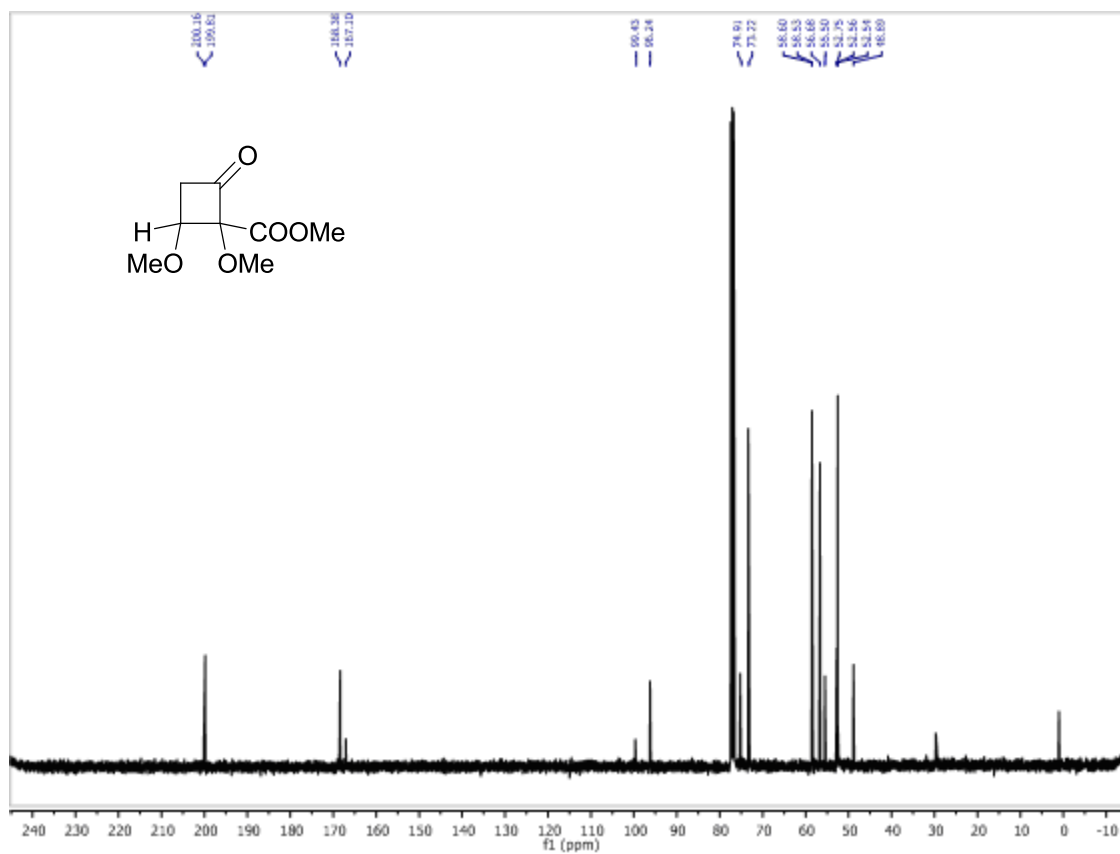

Methyl 3,4-Dihydro-3-methoxy-4-oxo-2-phenyl-2H-pyran-3-carboxylate (15)

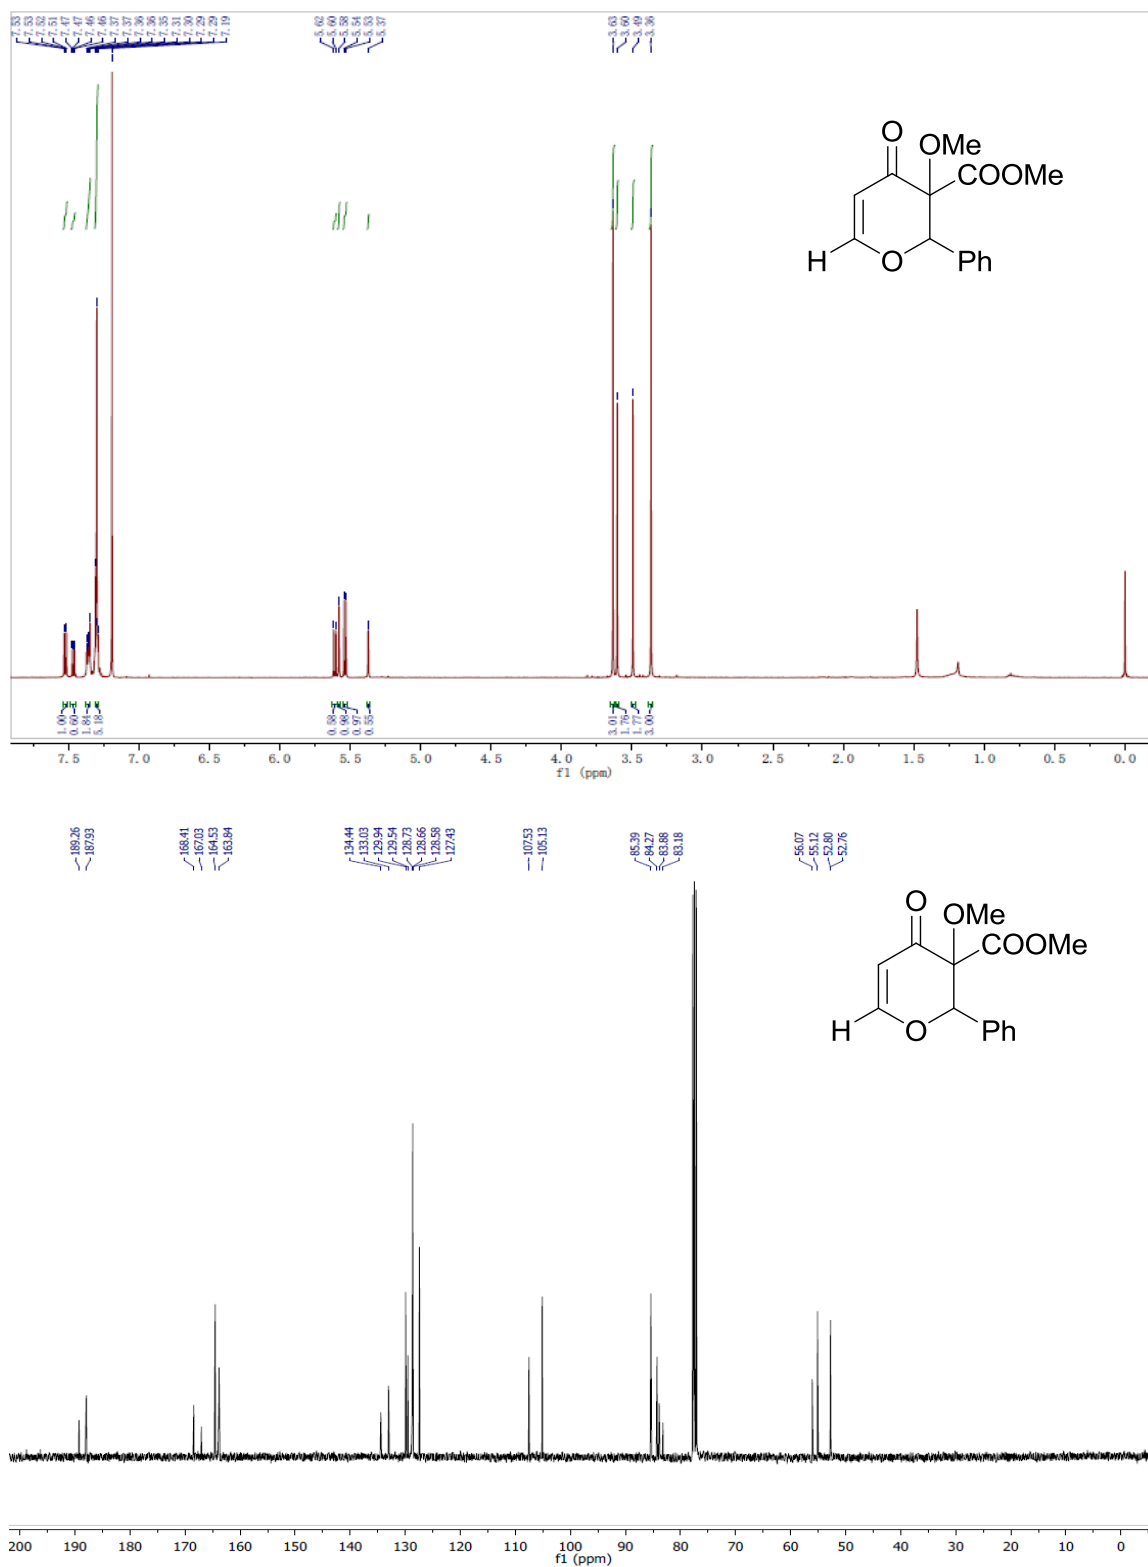

Methyl (*E*)-2,5-Dimethoxy-3-oxohex-4-enoate (17)

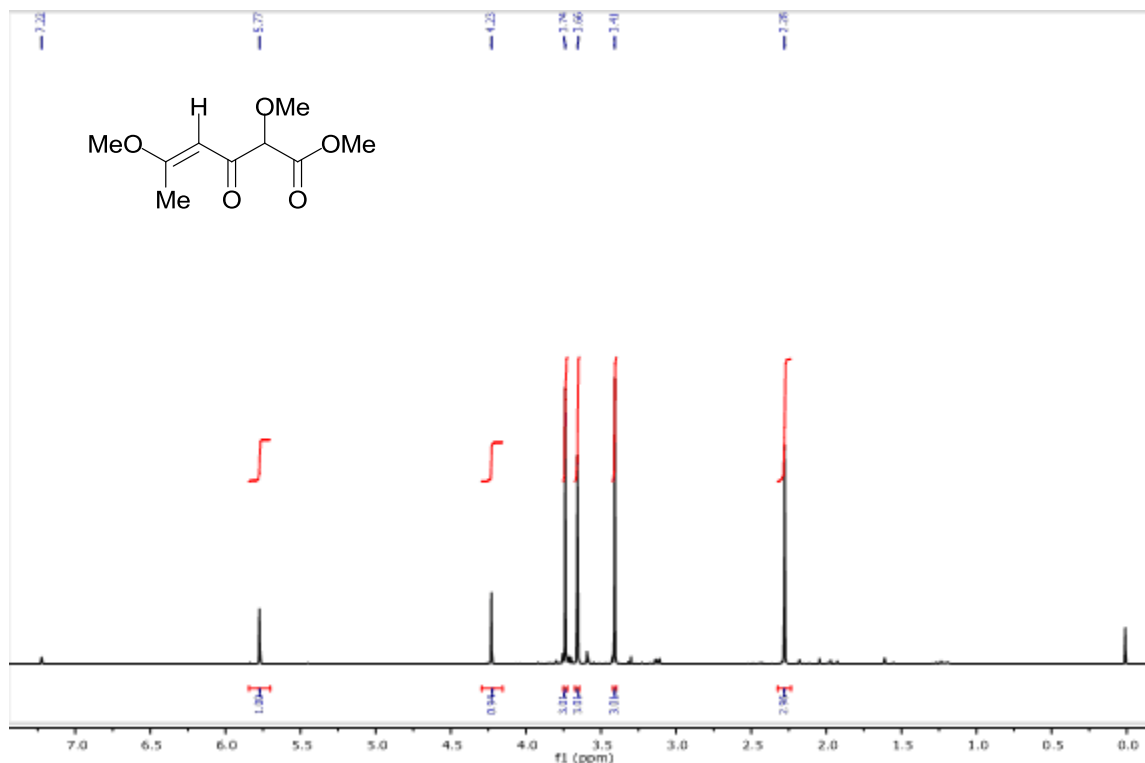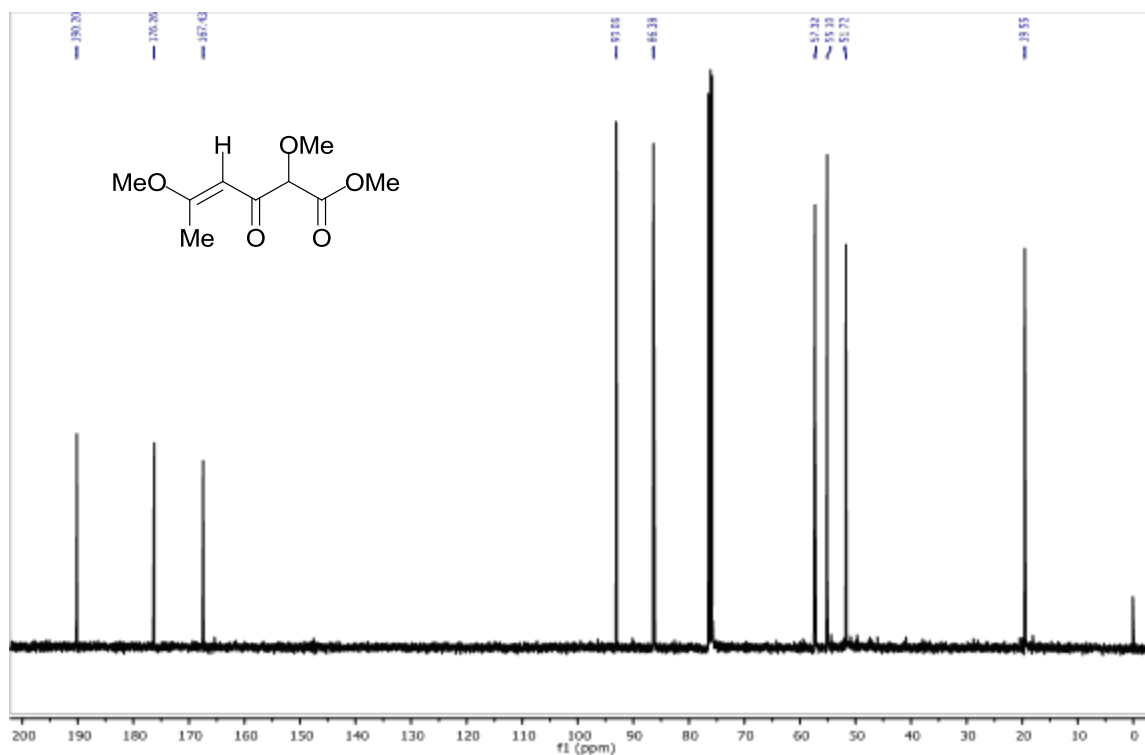

Methyl 2-Methoxy-2-(1-tosyl-1*H*-pyrazol-3-yl) acetate (18)

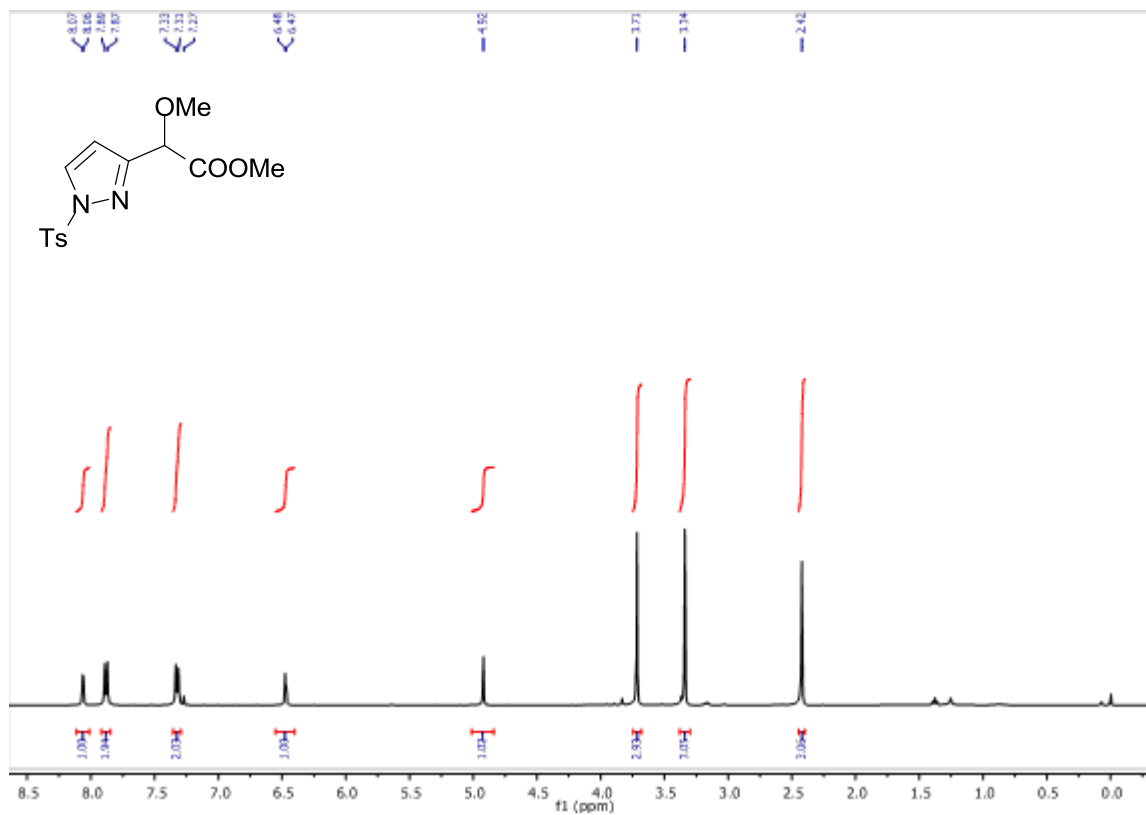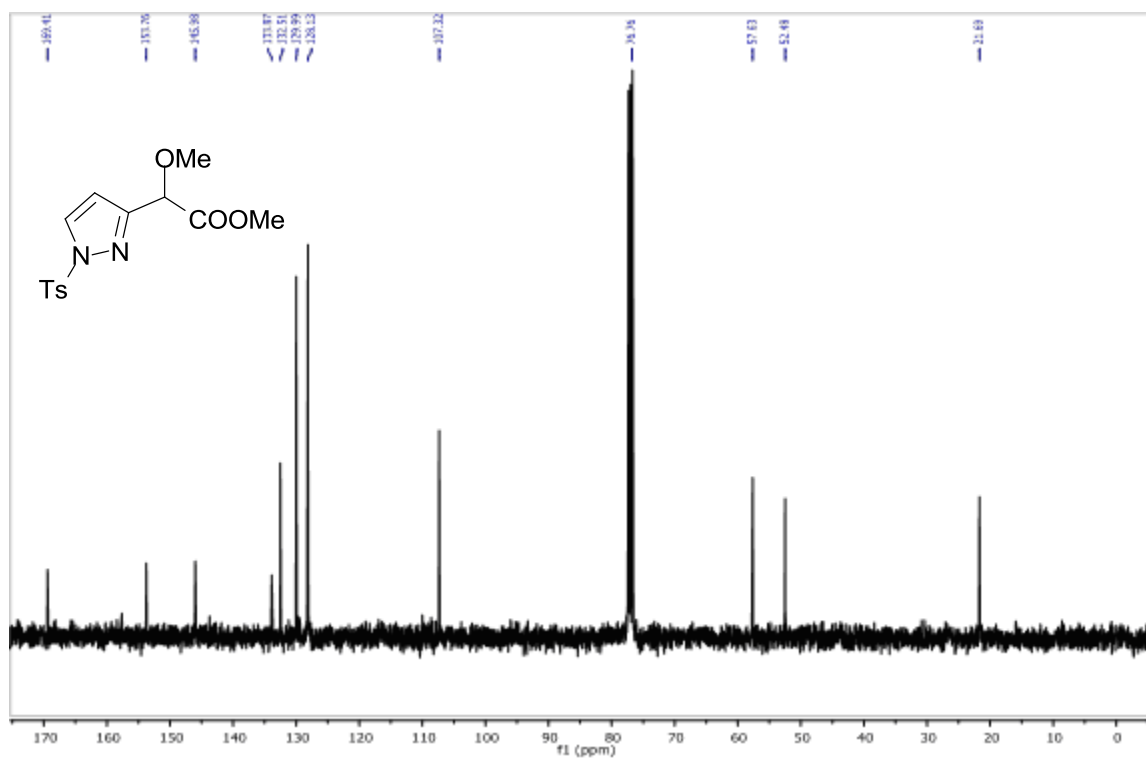

### 1D NOE study of the product **17**:

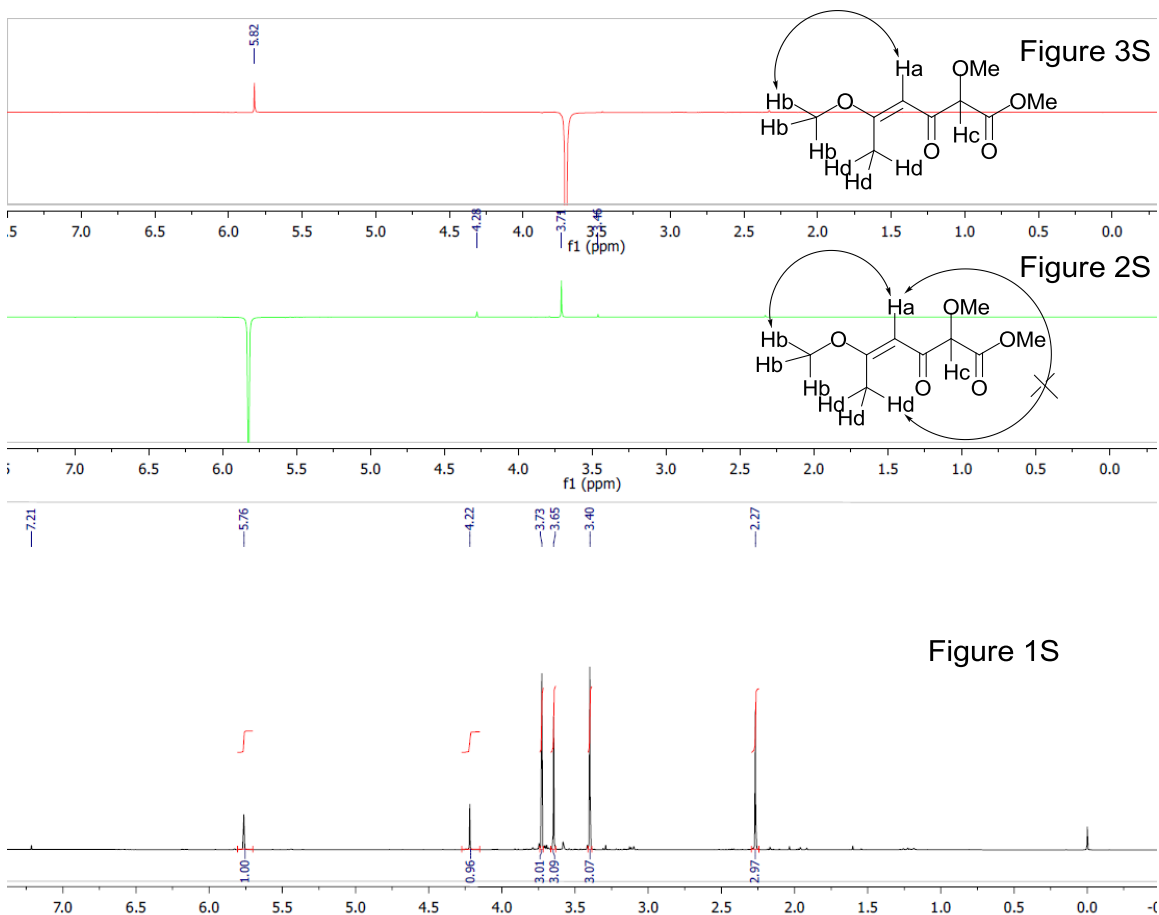

The configuration of **17** was determined by a 1D NOE study (Figure 1S). Activation of proton Ha (Figure 2S) of **17** gave a correlation with Hb and a very weak correlation with Hc, but no correlation with Hd. Again, when proton Hb was activated (Figure 3S), a clear correlation was observed between Ha and Hb. Based on the above spectral data, product **17** is assigned to have the (*E*)-configuration.
